# Supplementary material for: Lawesson's reagent-initiated domino reaction of aminopropenoyl cyclopropanes: synthesis of thieno[3,2-c]pyridinones
Source: Royal Society of Chemistry journal article supplement (doi:10.1039/c2ob06709a), 2011-12-08
Supplement: c2ob06709a.pdf [file c2ob06709a.pdf]

# Lawesson's Reagent-Initiated Domino Reactions of Dimethylaminopropenoyl Cyclopropanes: Synthesis of Thieno[3,2-c]pyridinones

Peng Huang, Rui Zhang, Yongjiu Liang and Dewen Dong \*

Changchun Institute of Applied Chemistry, Chinese Academy of Sciences, Changchun, 130022, China.

E-mail: [dwdong@ciac.jl.cn](mailto:dwdong@ciac.jl.cn)

## Supplementary information

|                                                                  |     |
|------------------------------------------------------------------|-----|
| <b>I.</b> Copies of NMR spectra for substrates <b>1h-k</b> ..... | S2  |
| <b>II.</b> Copies of NMR spectra for products <b>2</b> .....     | S7  |
| <b>III.</b> Copies of NMR spectra for products <b>3</b> .....    | S20 |

## I. Copies of NMR spectra for substrates 1h-k

1h

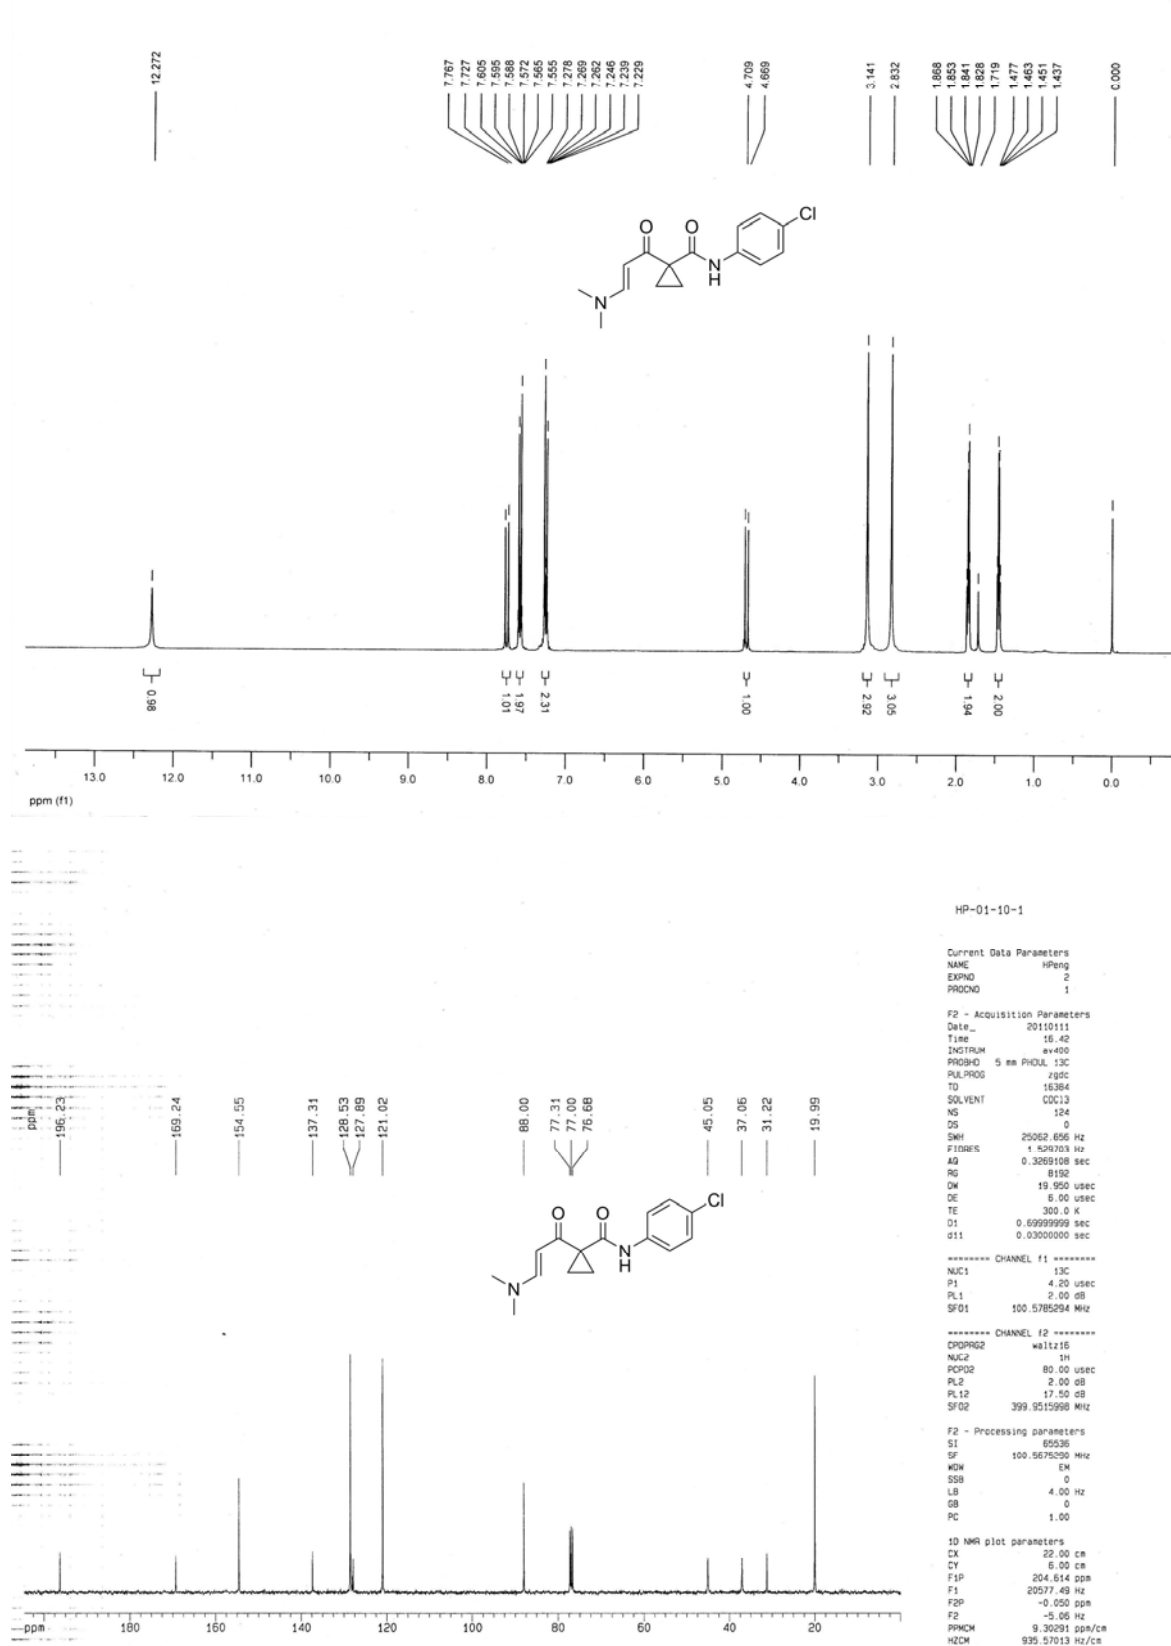

1i

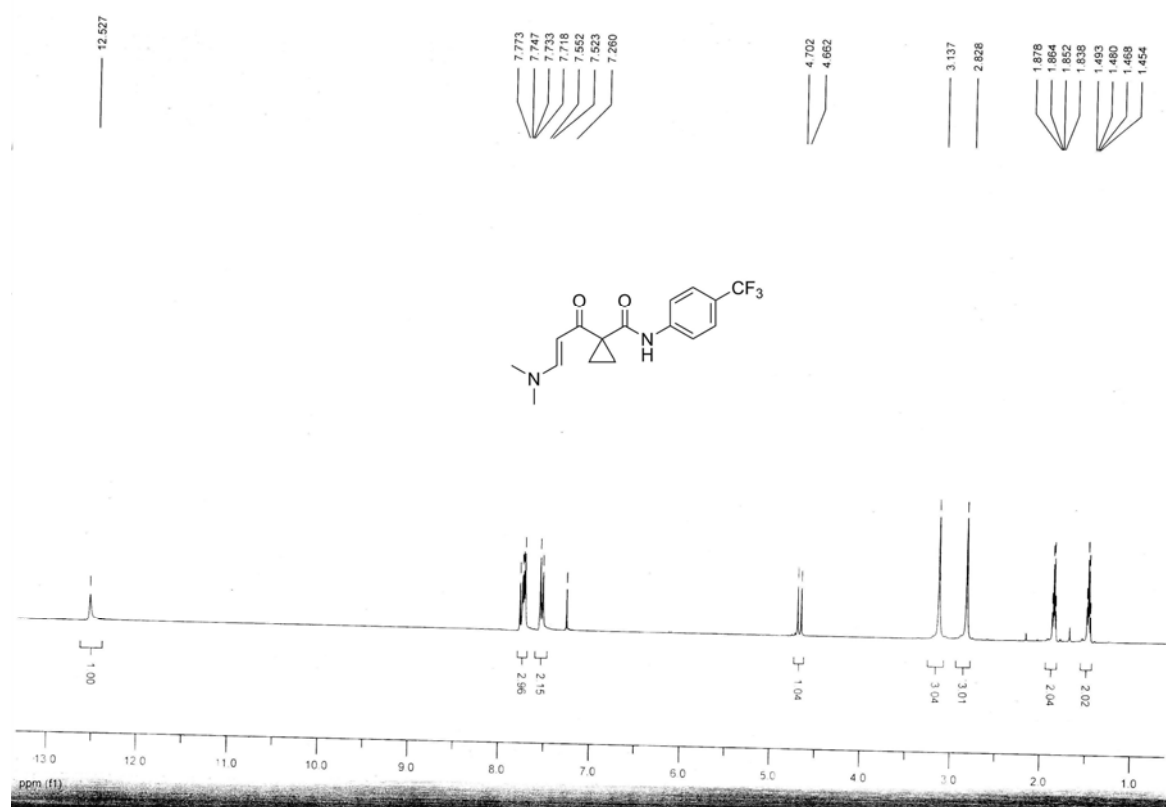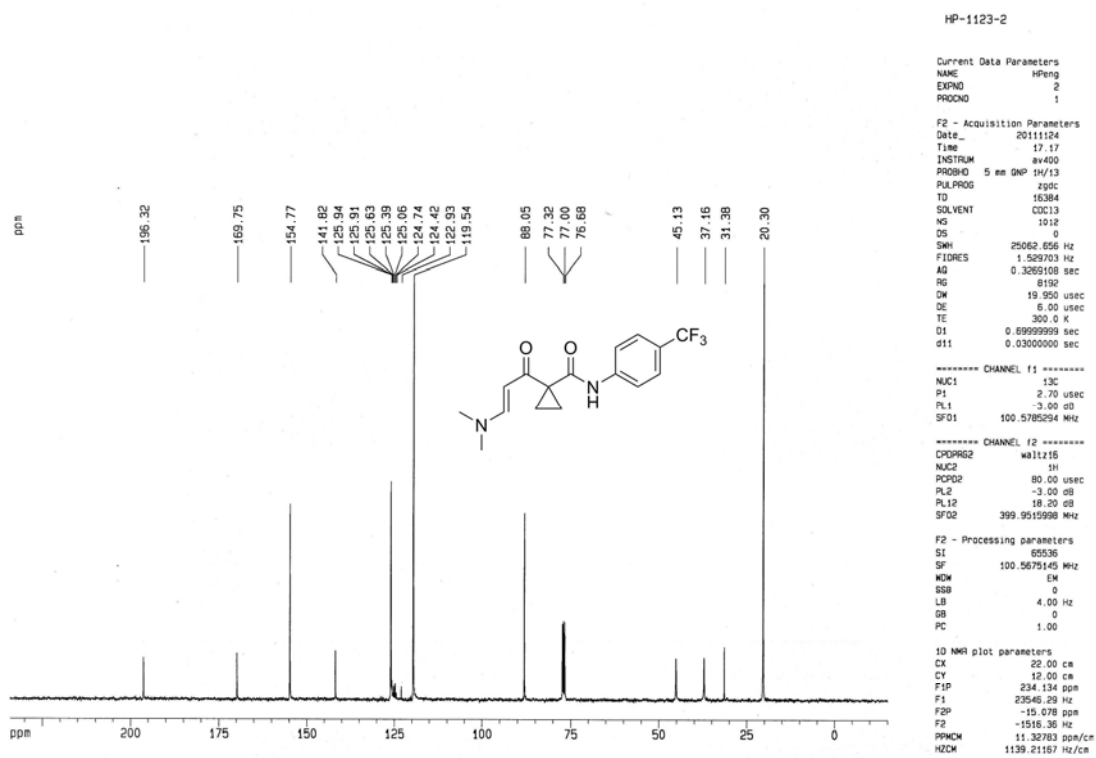

1i

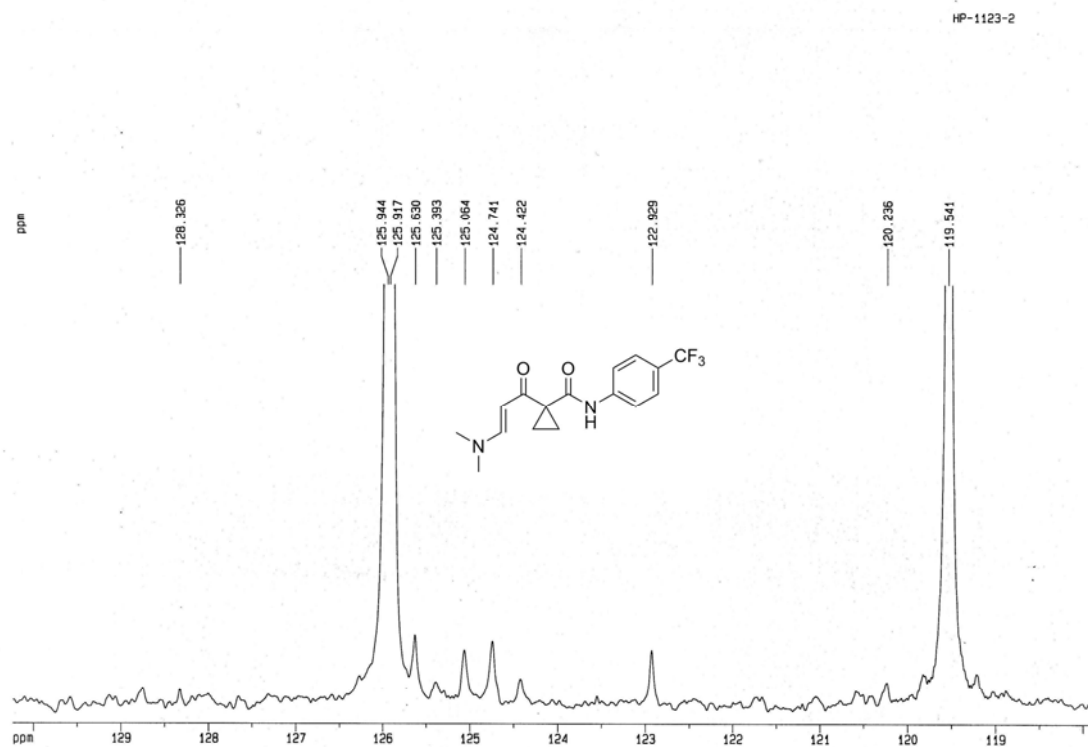

1j

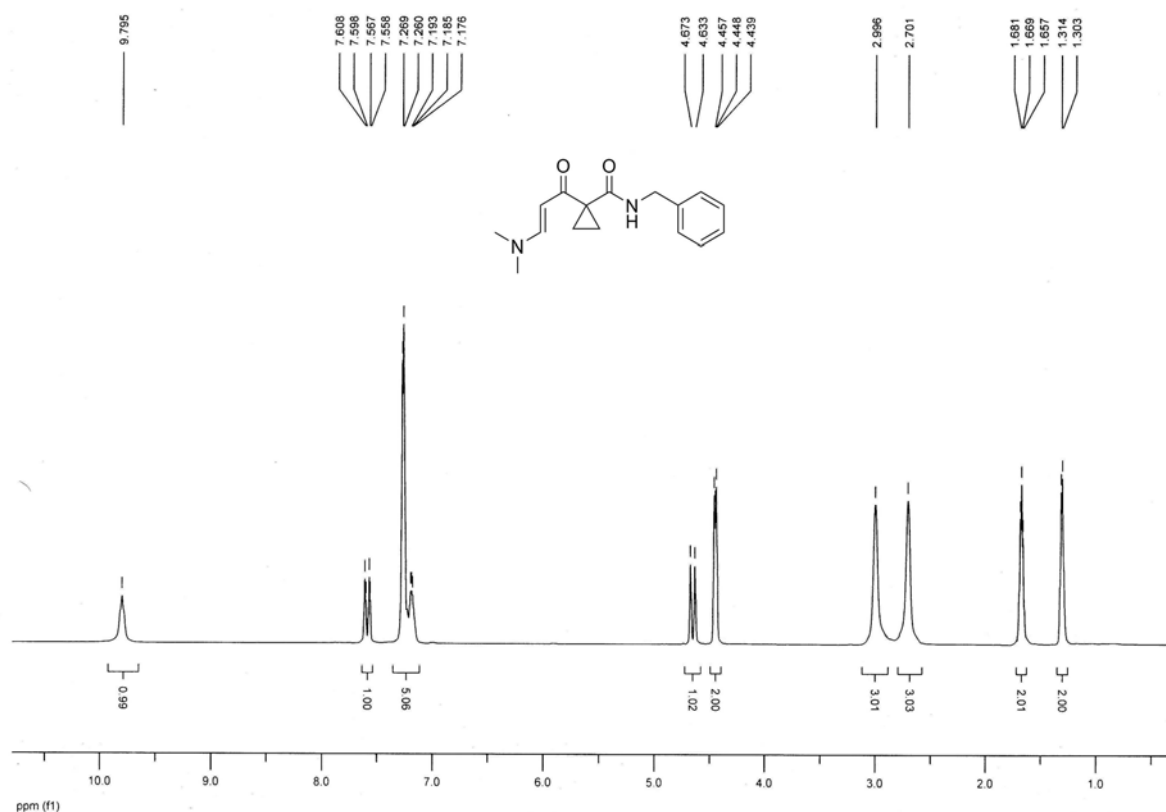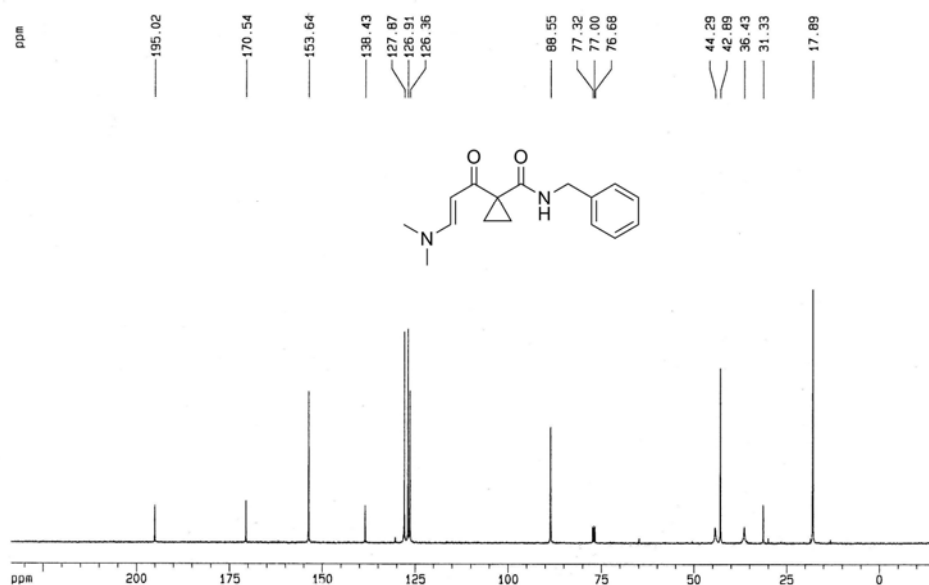

HP-01-17-2

Current Date Parameters  
NAME HPeng  
EXPNO 7  
PROCNO 1

F2 - Acquisition Parameters  
Date\_ 20110117  
Time 16.49  
INSTRUM av400  
PROBHD 5 mm QNP 1H/13  
PULPROG zgpg30  
TD 16384  
SOLVENT CDCl3  
NS 275  
DS 0  
SWH 25062.656 Hz  
FIDRES 1.529703 Hz  
AQ 0.3269108 sec  
RG 6192  
DW 19.950 usec  
DE 6.00 usec  
TE 303.0 K  
D1 0.69999999 sec  
d11 0.03000000 sec

\*\*\*\*\* CHANNEL f1 \*\*\*\*\*  
NUC1 13C  
P1 2.70 usec  
PL1 -3.00 dB  
SFO1 100.5785294 MHz

\*\*\*\*\* CHANNEL f2 \*\*\*\*\*  
CPDPRG2 waltz16  
NUC2 1H  
PCPD2 80.00 usec  
PL2 -3.00 dB  
PL12 18.20 dB  
SFO2 399.9515998 MHz

F2 - Processing parameters  
SI 65536  
SF 100.5675600 MHz  
WDW EM  
SSB 0  
LB 4.00 Hz  
GB 0  
PC 1.00

1D NMR plot parameters  
CX 22.00 cm  
CY 6.00 cm  
F1P 233.682 ppm  
F1 23500.79 Hz  
F2P -15.531 ppm  
F2 -1561.87 Hz  
PQMCN 11.32782 ppm/cm  
HZCM 1139.2167 Hz/cm

1k

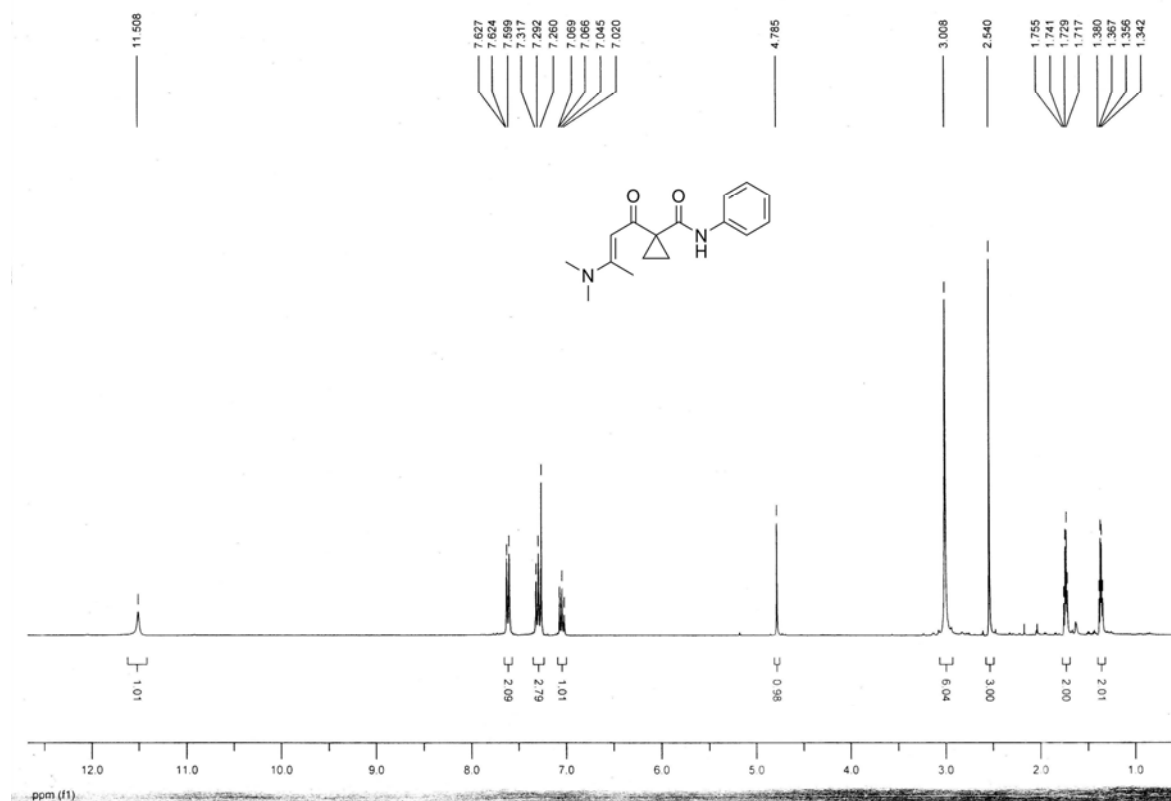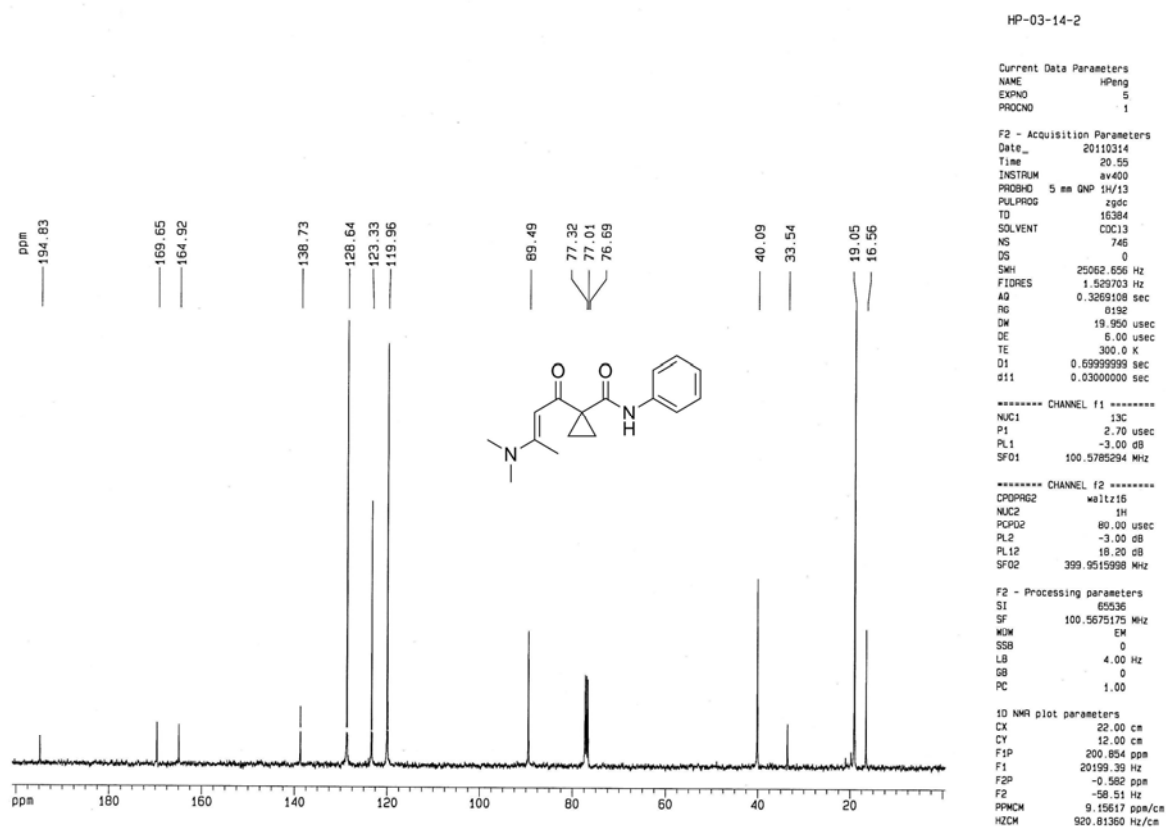

HP-03-14-2

Current Data Parameters  
NAME HPeng  
EXPNO 5  
PROCNO 1

F2 - Acquisition Parameters  
Date\_ 20110314  
Time 20.55  
INSTRUM av400  
PROBHD 5 mm QNP 1H/13  
PULPROG zgpg  
TD 16384  
SOLVENT CDCl<sub>3</sub>  
NS 746  
DS 0  
SWH 25062.656 Hz  
FIDRES 1.529703 Hz  
AQ 0.3269108 sec  
RG 0192  
DM 19.950 usec  
DE 6.00 usec  
TE 300.0 K  
D1 0.69999999 sec  
d11 0.03000000 sec

\*\*\*\*\* CHANNEL f1 \*\*\*\*\*  
NUC1 13C  
P1 2.70 usec  
PL1 -3.00 dB  
SF01 100.5785294 MHz

\*\*\*\*\* CHANNEL f2 \*\*\*\*\*  
CPDPRG2 waltz16  
NUC2 1H  
PCPD2 80.00 usec  
PL2 -3.00 dB  
PL12 18.20 dB  
SF02 399.9515998 MHz

F2 - Processing parameters  
SI 65536  
SF 100.5675175 MHz  
WDW EM  
SSB 0  
LB 4.00 Hz  
GB 0  
PC 1.00

1D NMR plot parameters  
CX 22.00 cm  
CY 12.00 cm  
F1P 200.854 ppm  
F1 20199.39 Hz  
F2P -0.582 ppm  
F2 -58.51 Hz  
PPMCM 9.15617 ppm/cm  
HZCM 920.81360 Hz/cm

## II. Copies of NMR spectra for products 2

2a

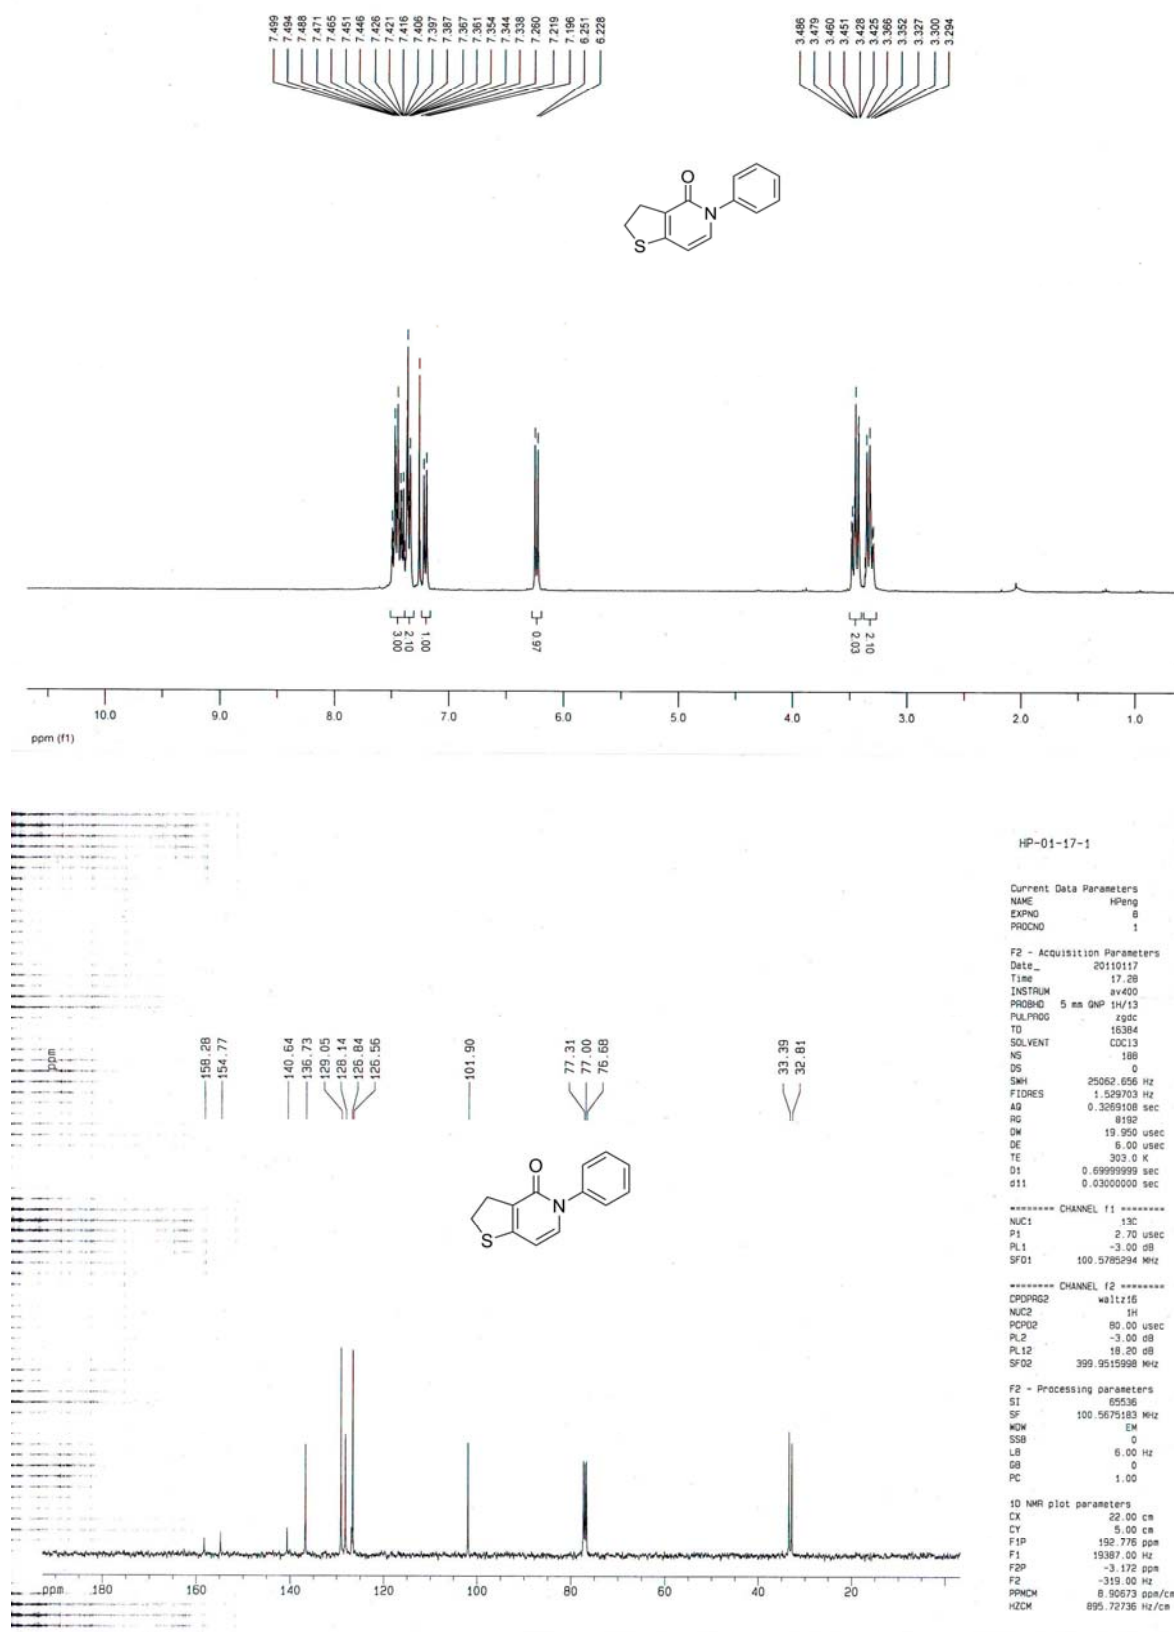

2b

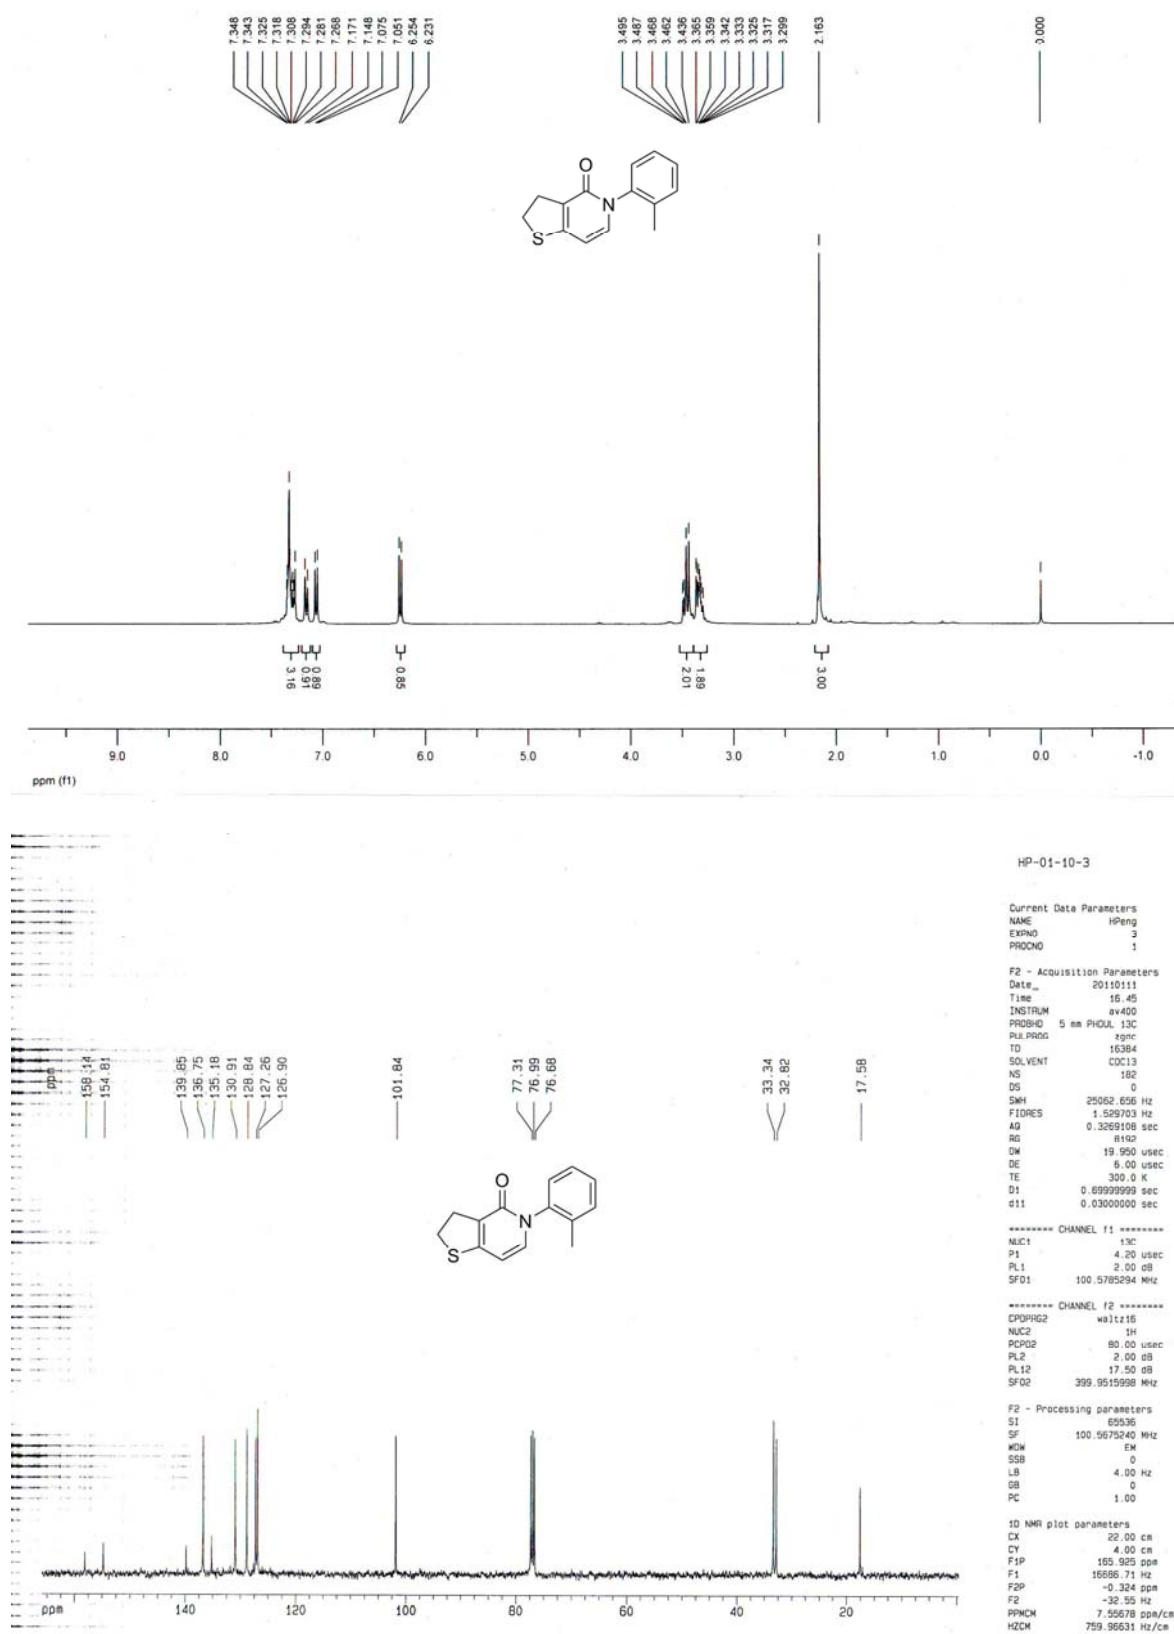



2c

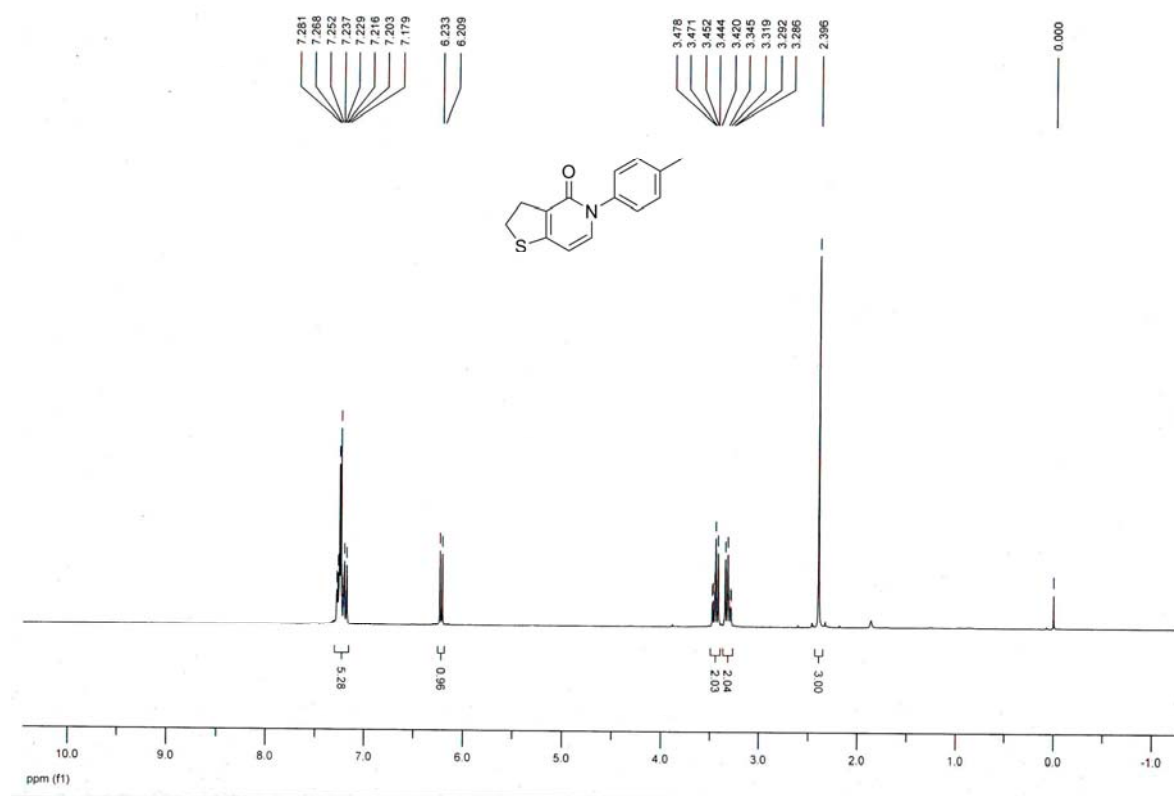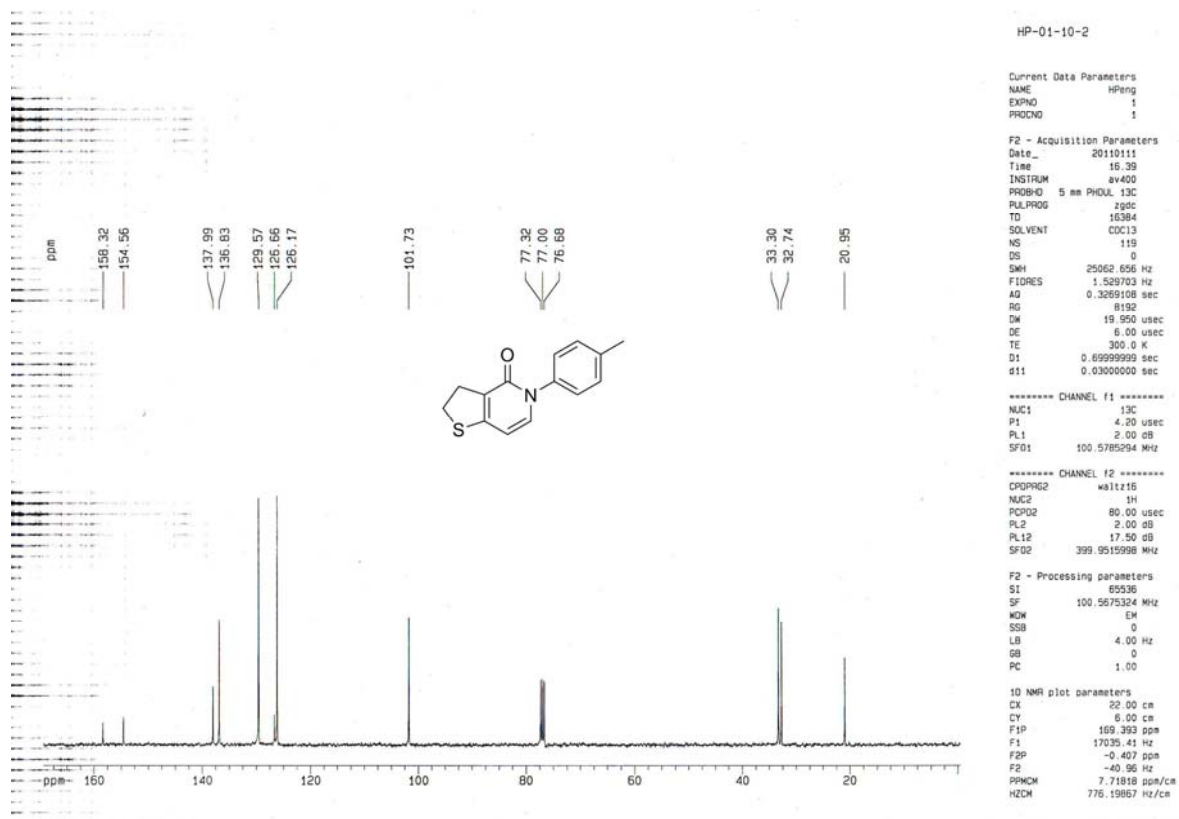

HP-01-10-2

Current Data Parameters  
NAME HPeng  
EXPNO 1  
PROCNO 1

F2 - Acquisition Parameters  
Date\_ 20110111  
Time 16.39  
INSTRUM av400  
PROBHD 5 mm PHDQ 13C  
PULPROG zgpg30  
TD 16384  
SOLVENT CDCl3  
NS 118  
DS 0  
SWH 25062.656 Hz  
FIDRES 1.529703 Hz  
AQ 0.3269108 sec  
RG 8192  
DM 19.950 usec  
DE 6.00 usec  
TE 300.0 K  
D1 0.69999999 sec  
d11 0.03000000 sec

\*\*\*\*\* CHANNEL f1 \*\*\*\*\*  
NUC1 13C  
P1 4.20 usec  
PL1 2.00 dB  
SFO1 100.578594 MHz

\*\*\*\*\* CHANNEL f2 \*\*\*\*\*  
CPDPRG2 waltz16  
NUC2 1H  
PCPD2 80.00 usec  
PL2 2.00 dB  
PL12 17.50 dB  
SFO2 399.951598 MHz

F2 - Processing parameters  
SI 65536  
SF 100.5675324 MHz  
WDW EM  
SSB 0  
LB 4.00 Hz  
GB 0  
PC 1.00

1D NMR plot parameters  
CX 22.00 cm  
CY 6.00 cm  
F1P 169.393 ppm  
F1 17035.41 Hz  
F2P -0.407 ppm  
F2 -0.96 Hz  
PPMCM 7.71818 ppm/cm  
HZCM 776.19867 Hz/cm

2d

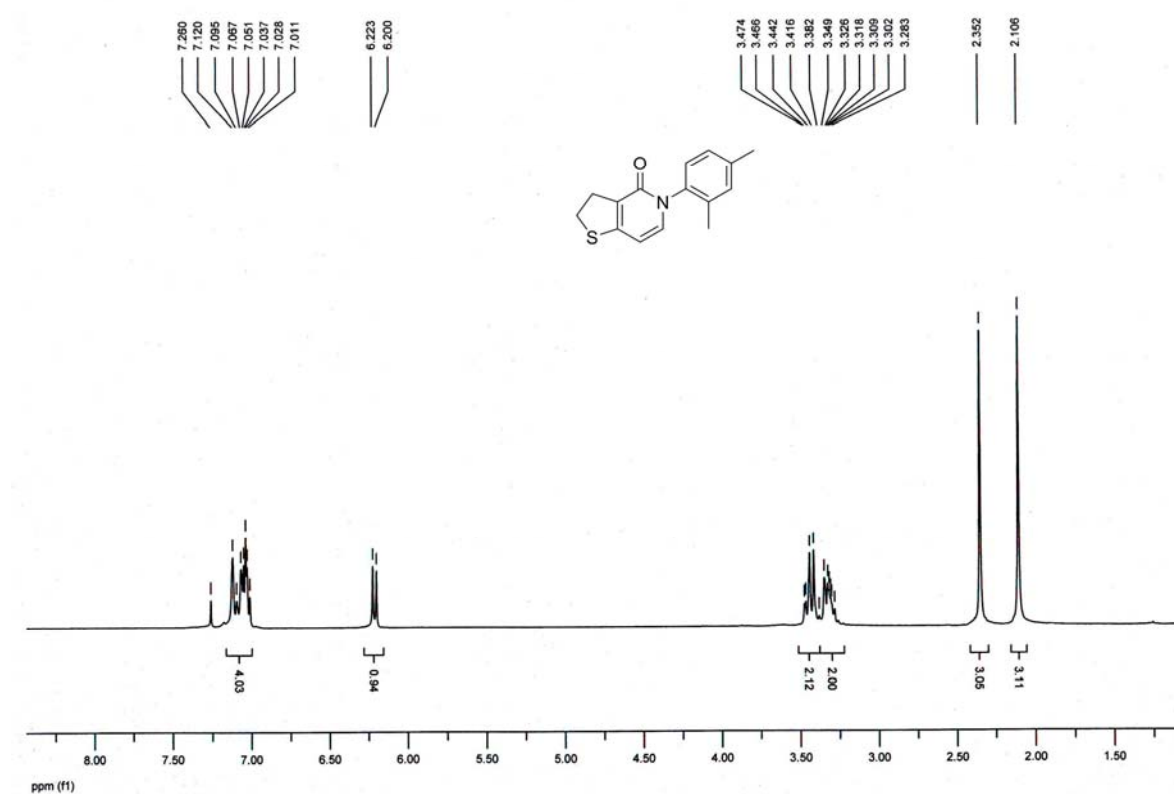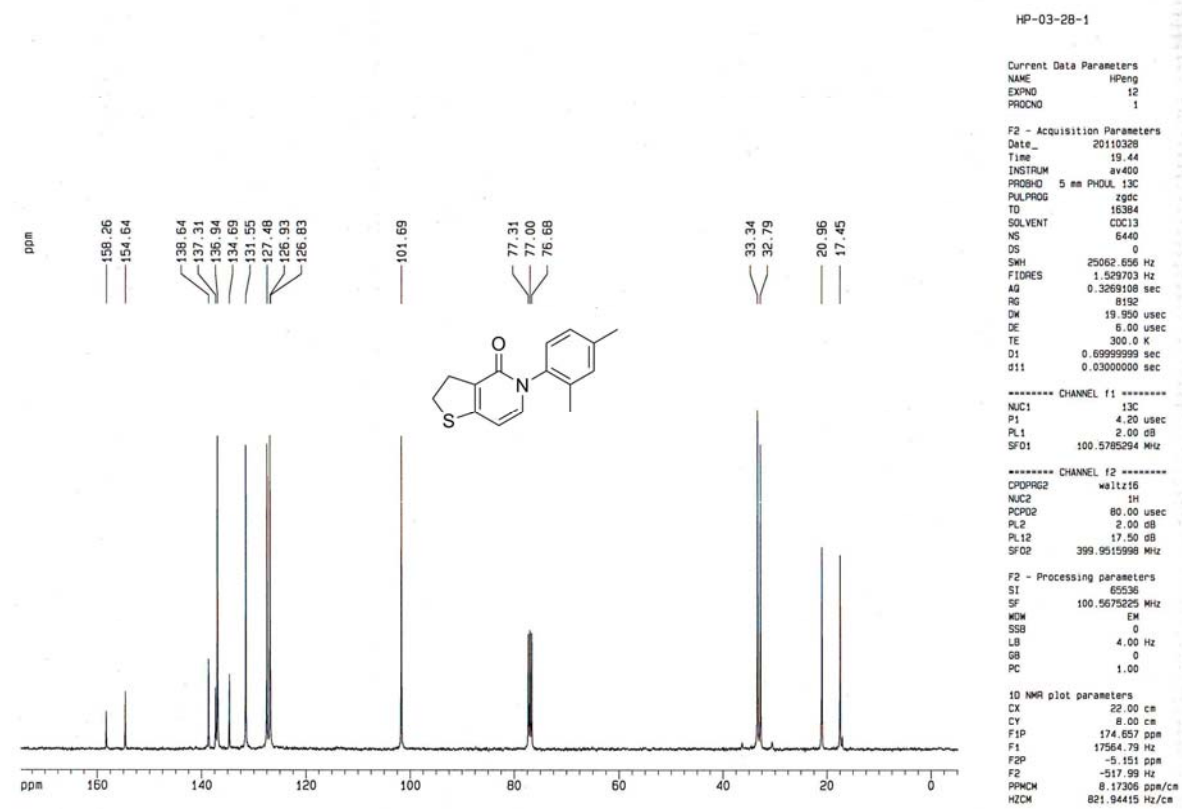

2e

huangpeng 03-21-2

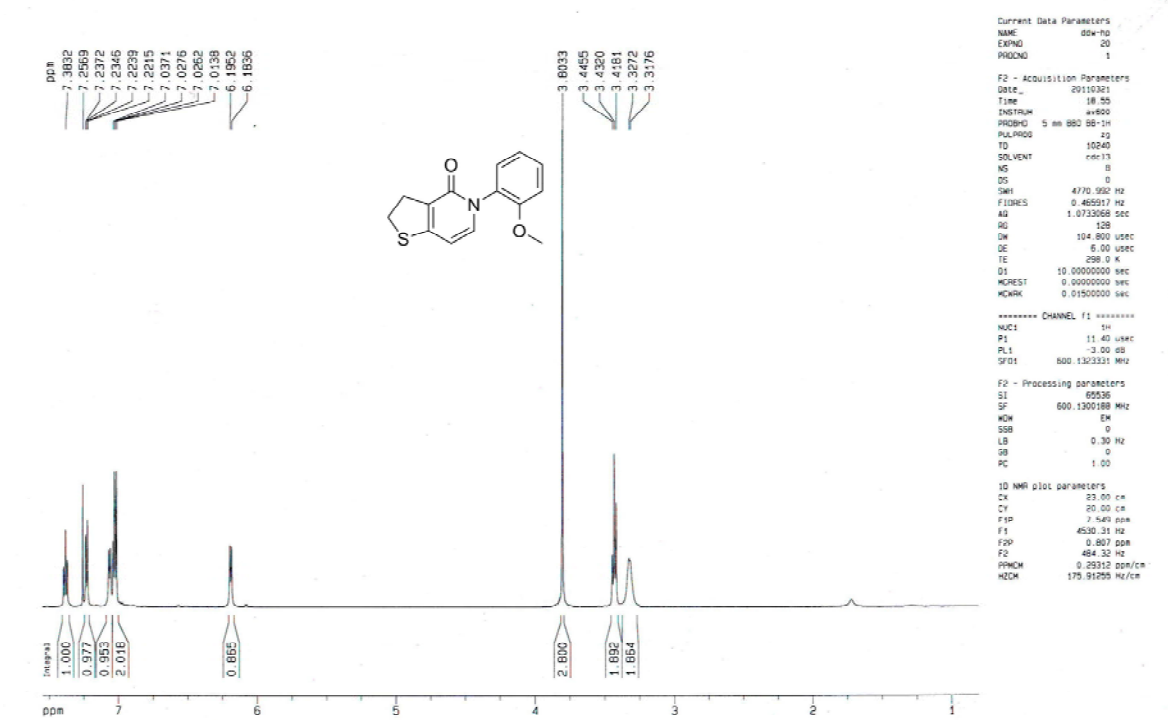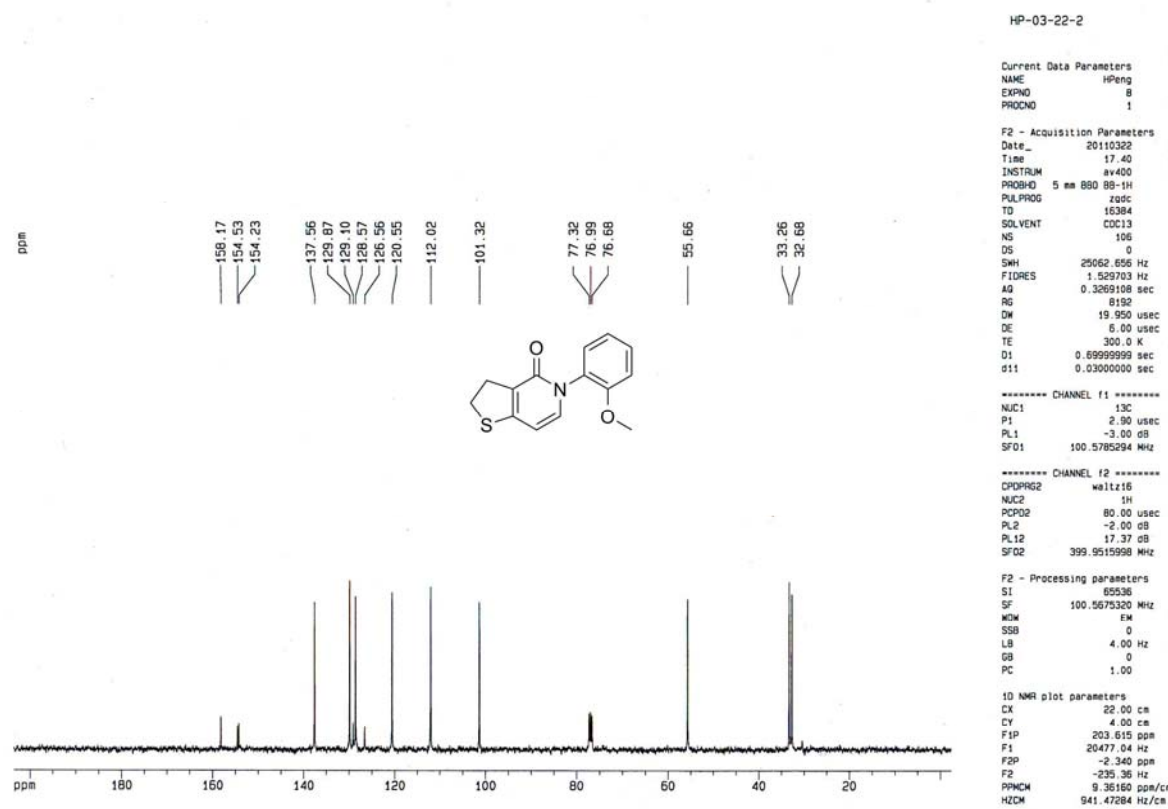

2f

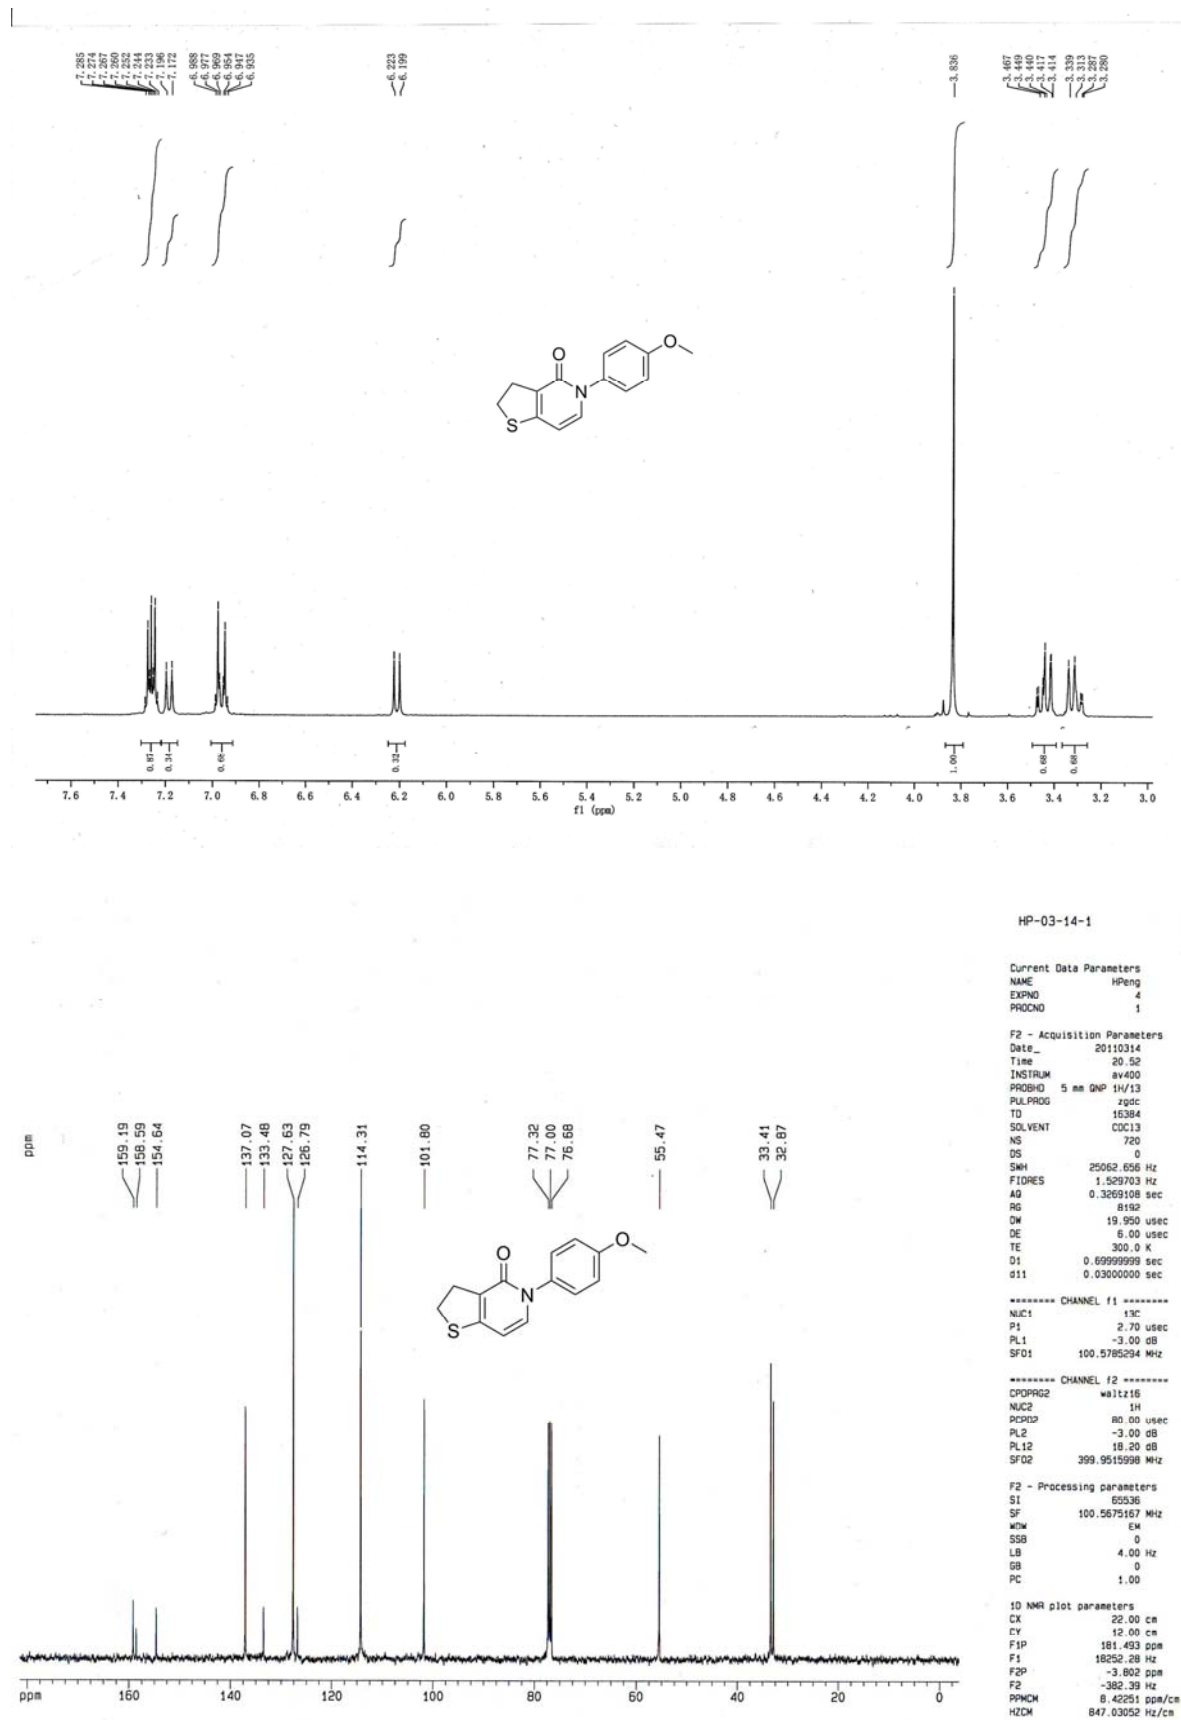

2g

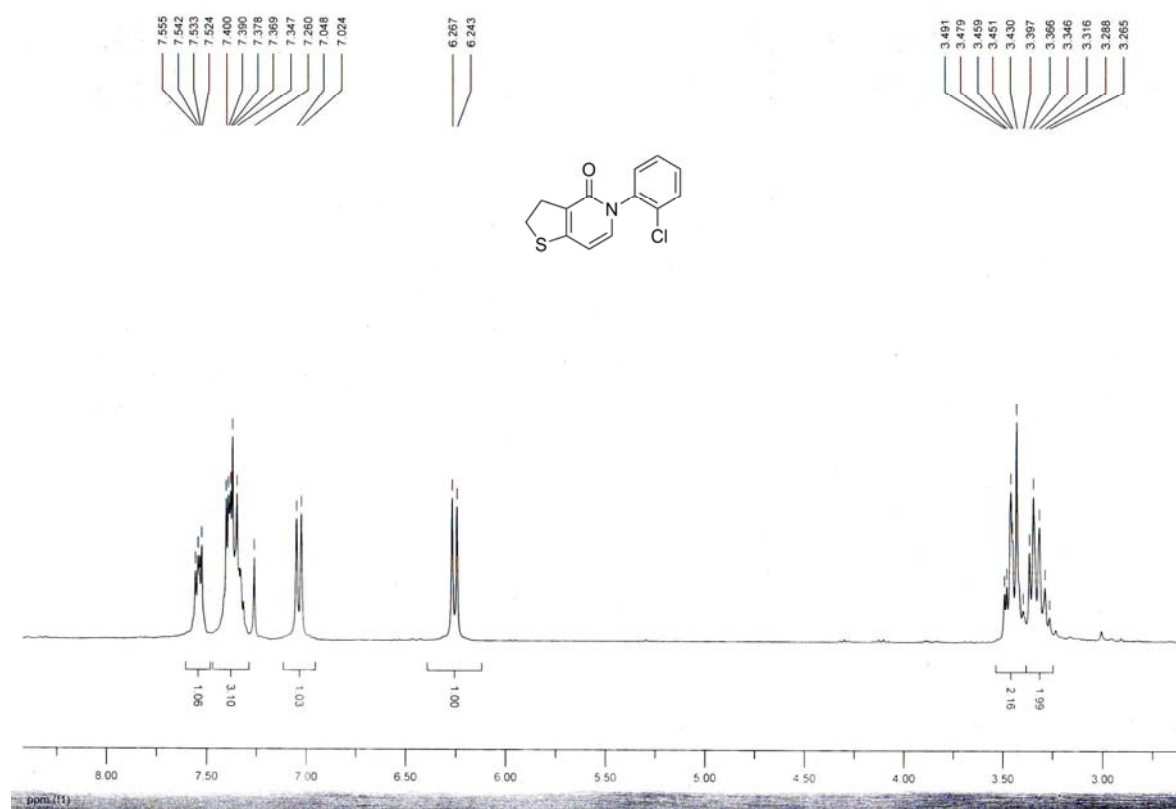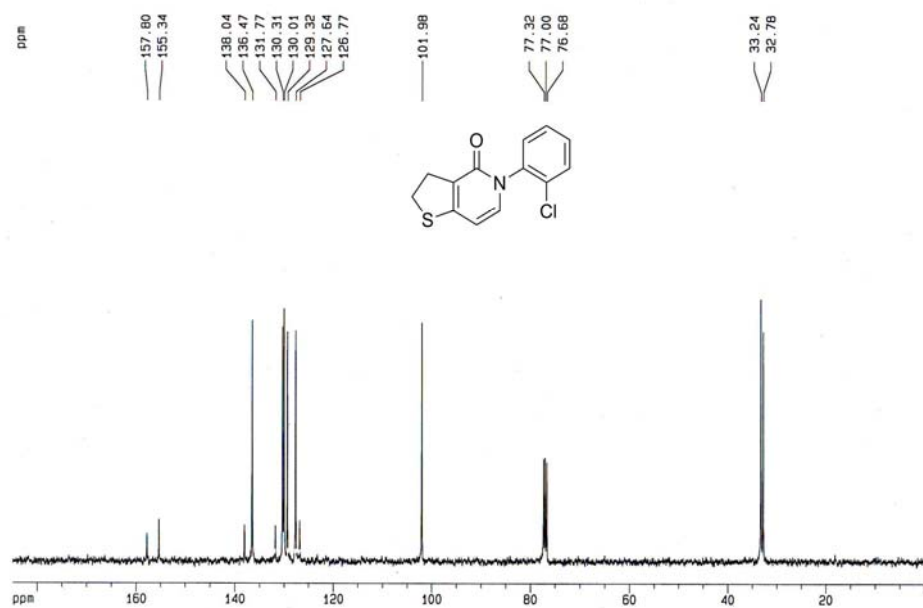

HP-03-07-1

Current Data Parameters  
NAME HPeng  
EXPNO 1  
PROCNO 1

F2 - Acquisition Parameters  
Date\_ 20110307  
Time 20.19  
INSTRUM av400  
PROBHD 5 mm QNP 1H/13  
PULPROG zgpg  
TD 16384  
SOLVENT CDCl3  
NS 389  
DS 0  
SWH 25062.655 Hz  
FIDRES 1.529703 Hz  
AQ 0.3269108 sec  
RG 8192  
DW 19.950 usec  
DE 6.00 usec  
TE 300.0 K  
D1 0.69999999 sec  
d11 0.03000000 sec

\*\*\*\*\* CHANNEL f1 \*\*\*\*\*  
NUC1 13C  
P1 2.70 usec  
PL1 -3.00 dB  
SFO1 100.5785294 MHz

\*\*\*\*\* CHANNEL f2 \*\*\*\*\*  
CPDPRG2 waltz16  
NUC2 1H  
PCPD2 80.00 usec  
PL2 -2.00 dB  
PL12 17.37 dB  
SFO2 399.9515998 MHz

F2 - Processing parameters  
SI 65536  
SF 100.5675248 MHz  
WDW EM  
SSB 0  
LB 4.00 Hz  
GB 0  
PC 2.00

1D NMR plot parameters  
CX 22.00 cm  
CY 6.00 cm  
F1P 184.964 ppm  
F1 18601.36 Hz  
F2P -0.977 ppm  
F2 -98.24 Hz  
PPMCH 8.45185 ppm/cm  
HZCM 849.98181 Hz/cm

2h

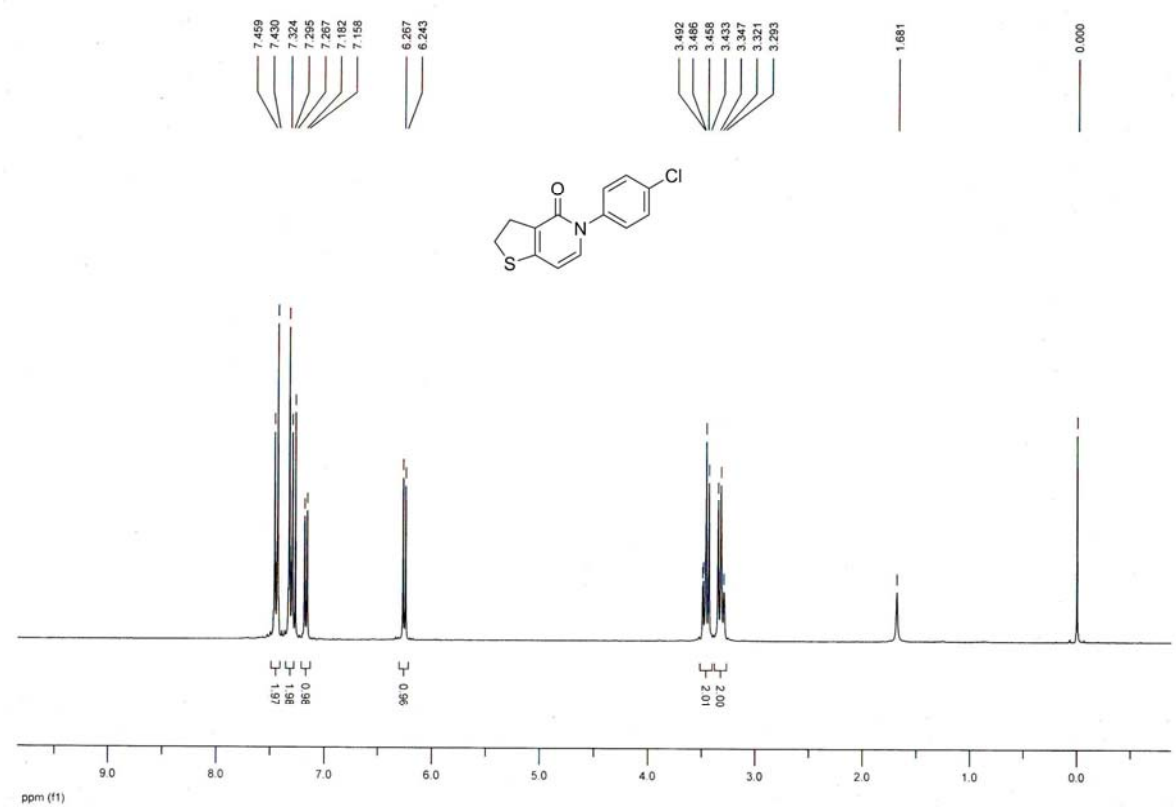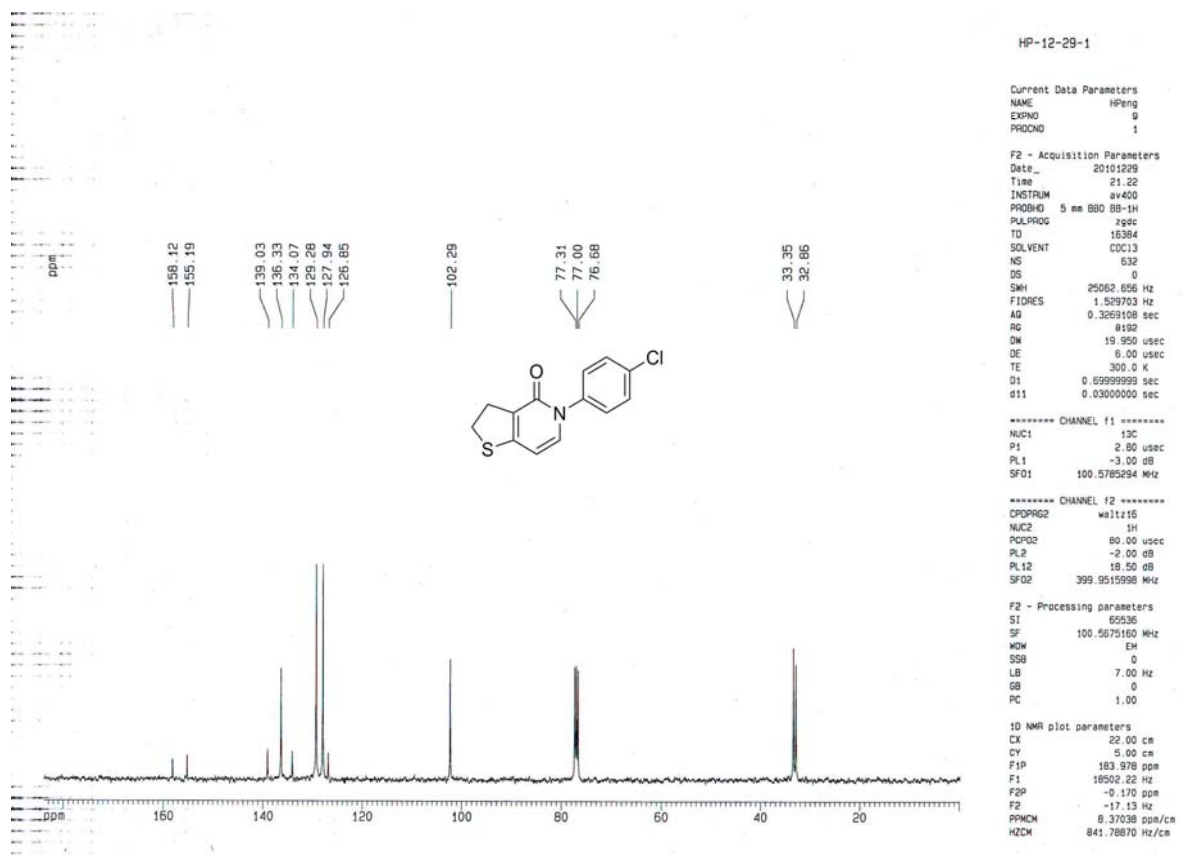

2i

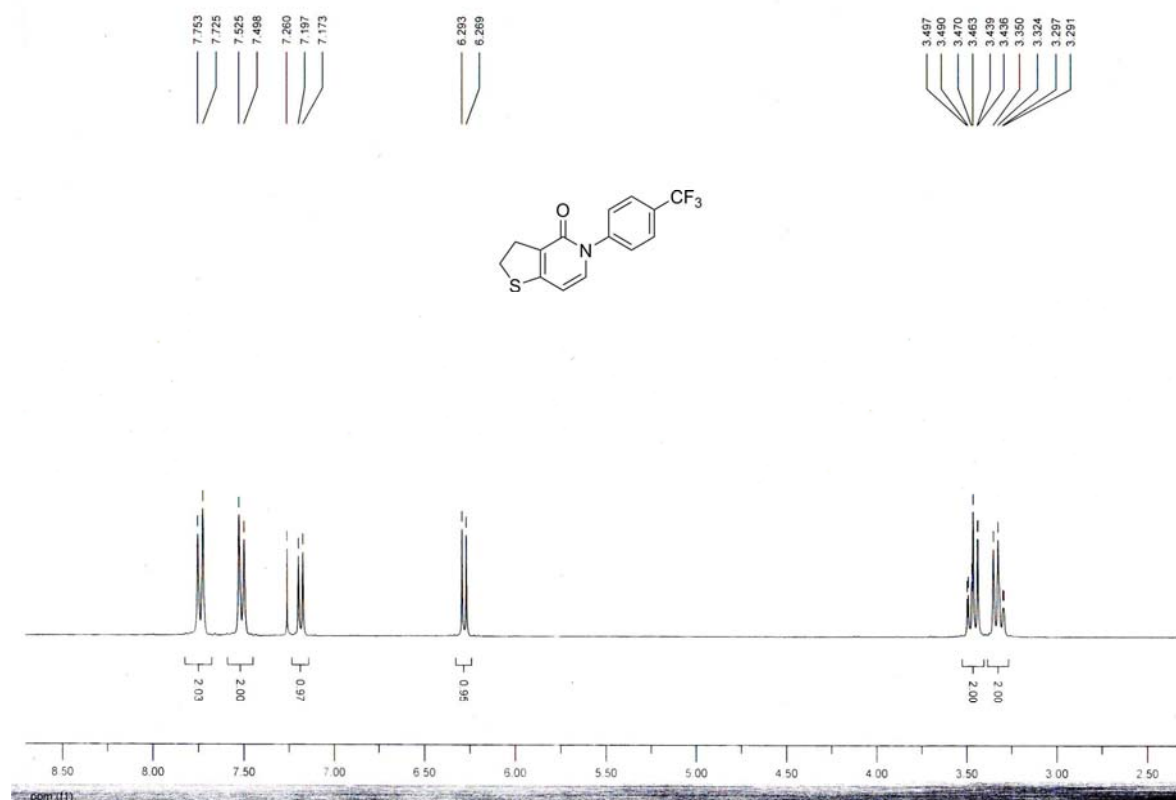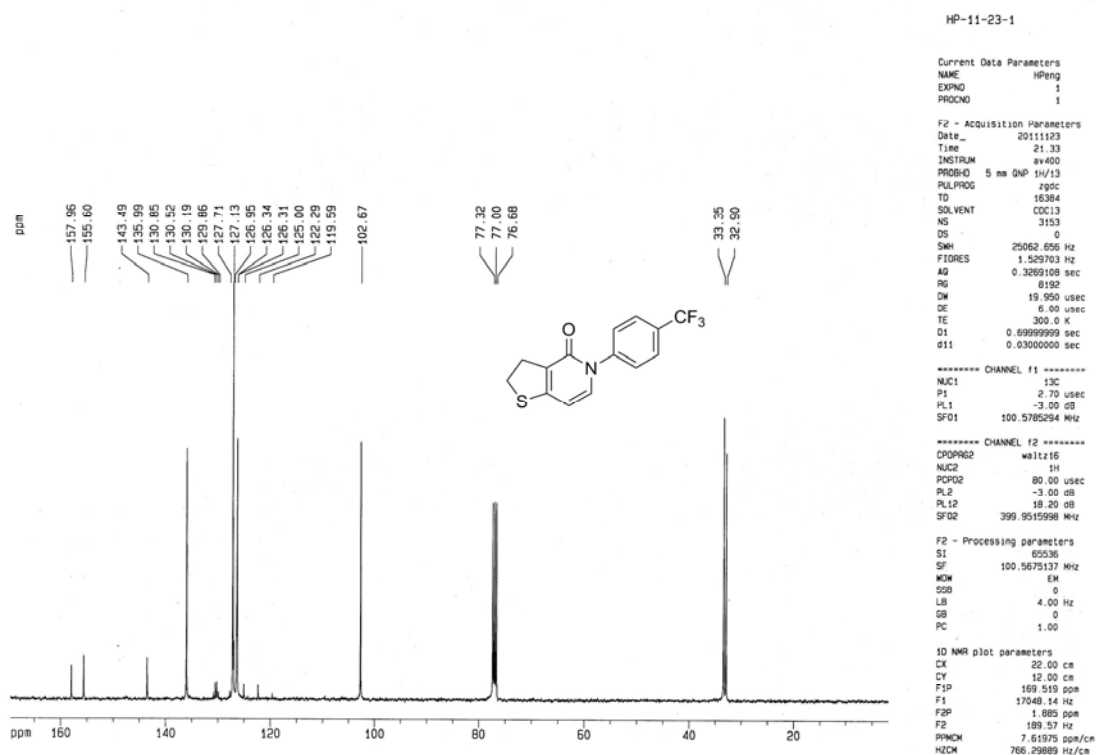

2i

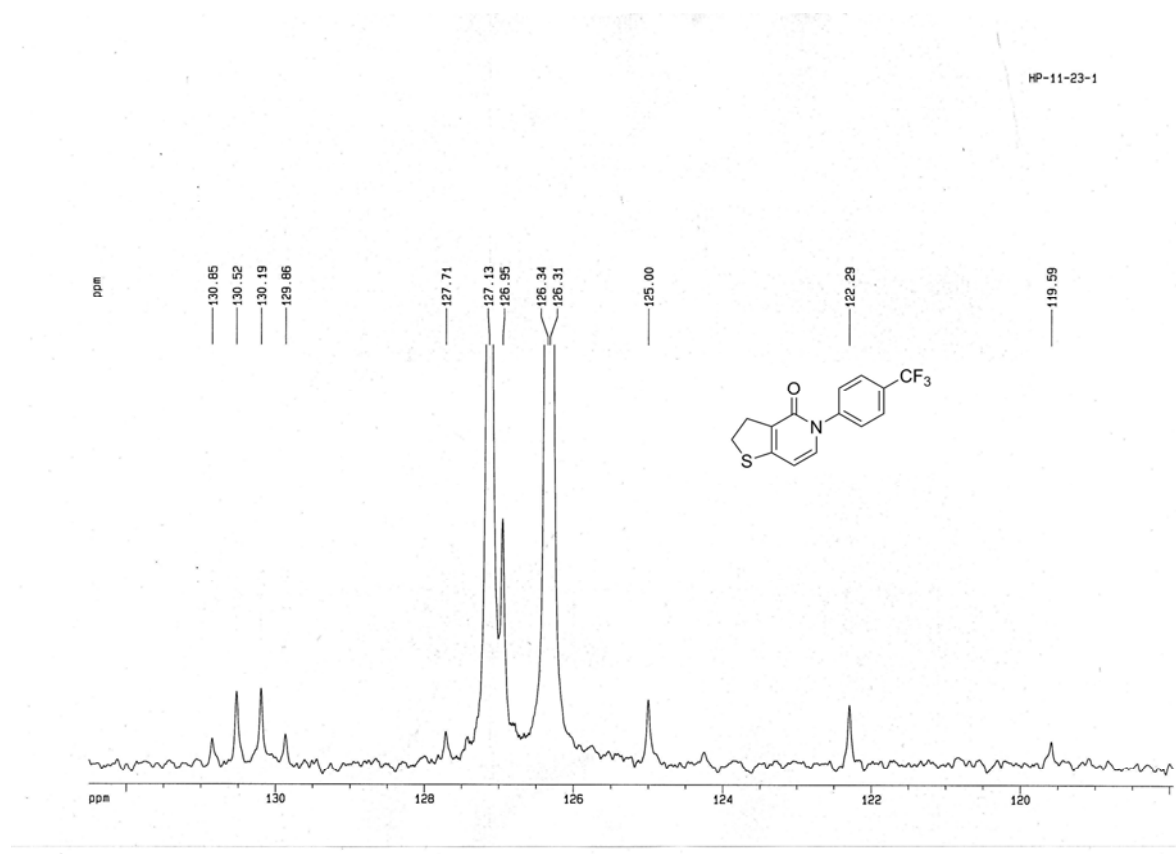



2j

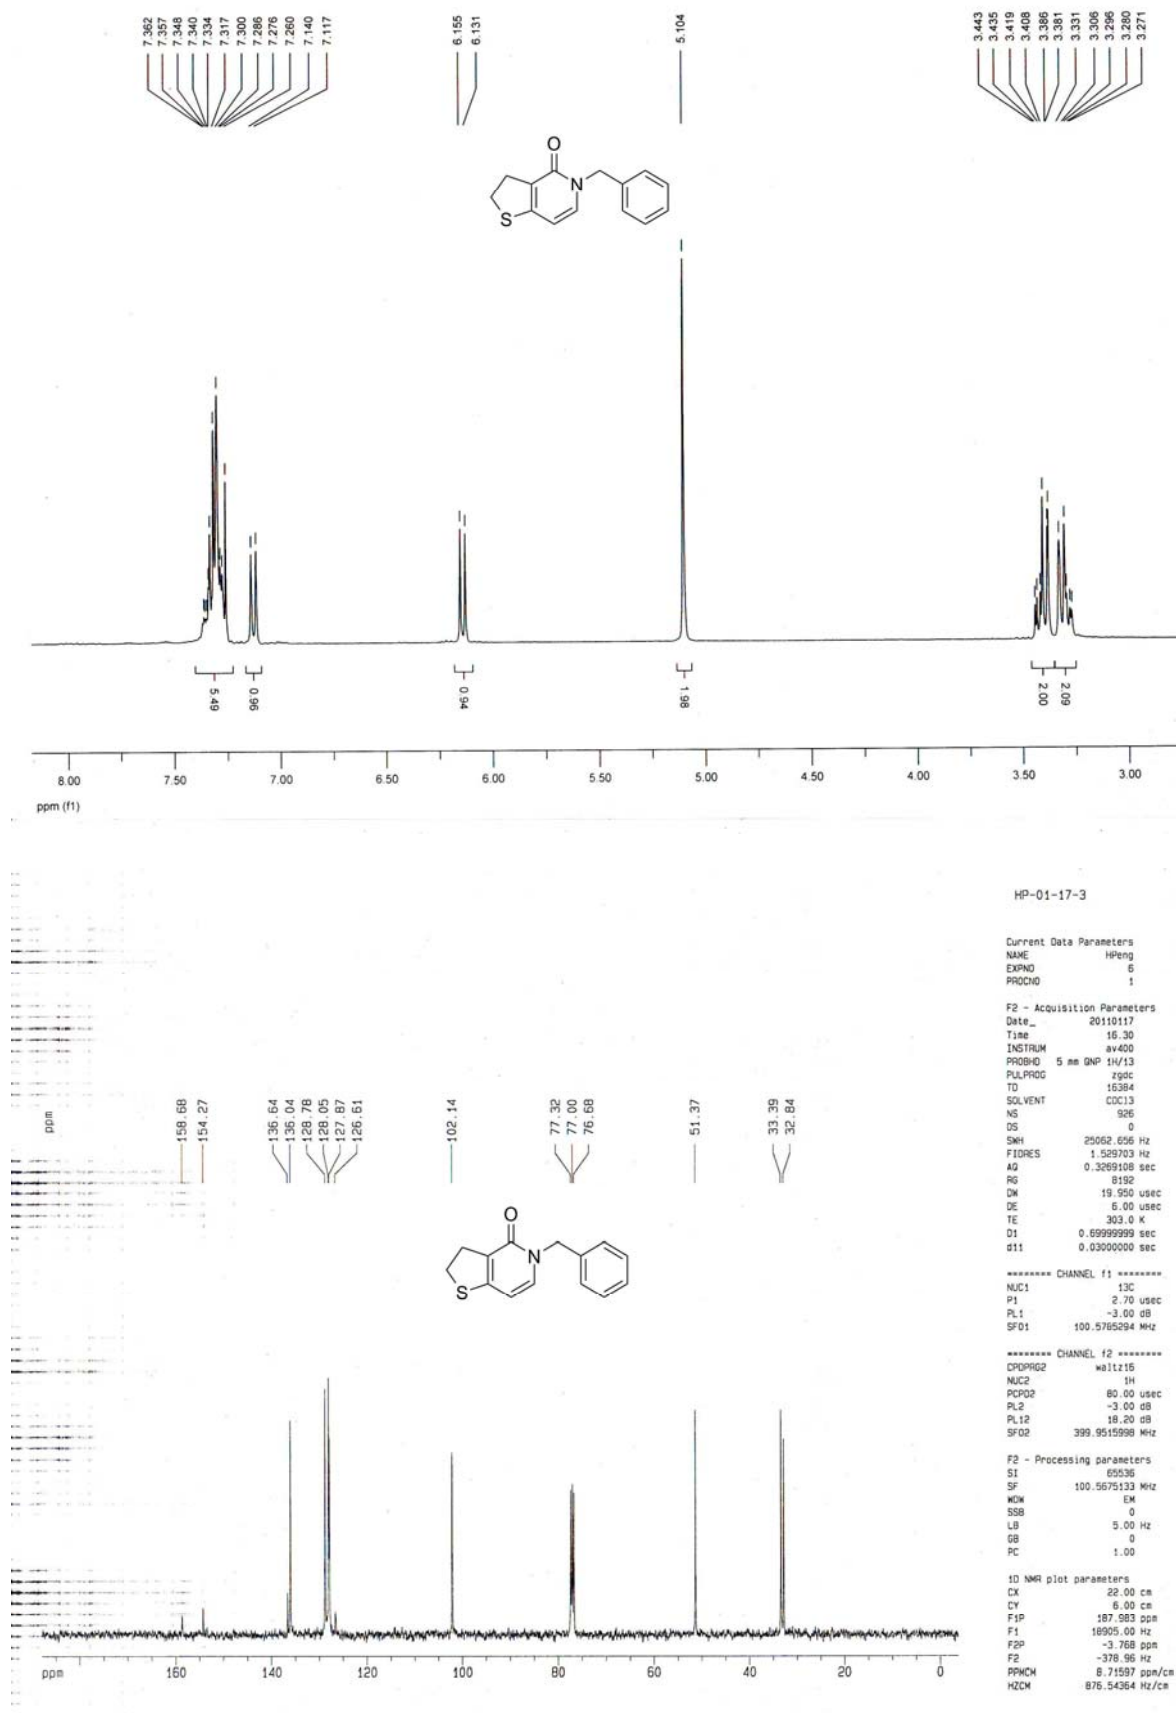

2k

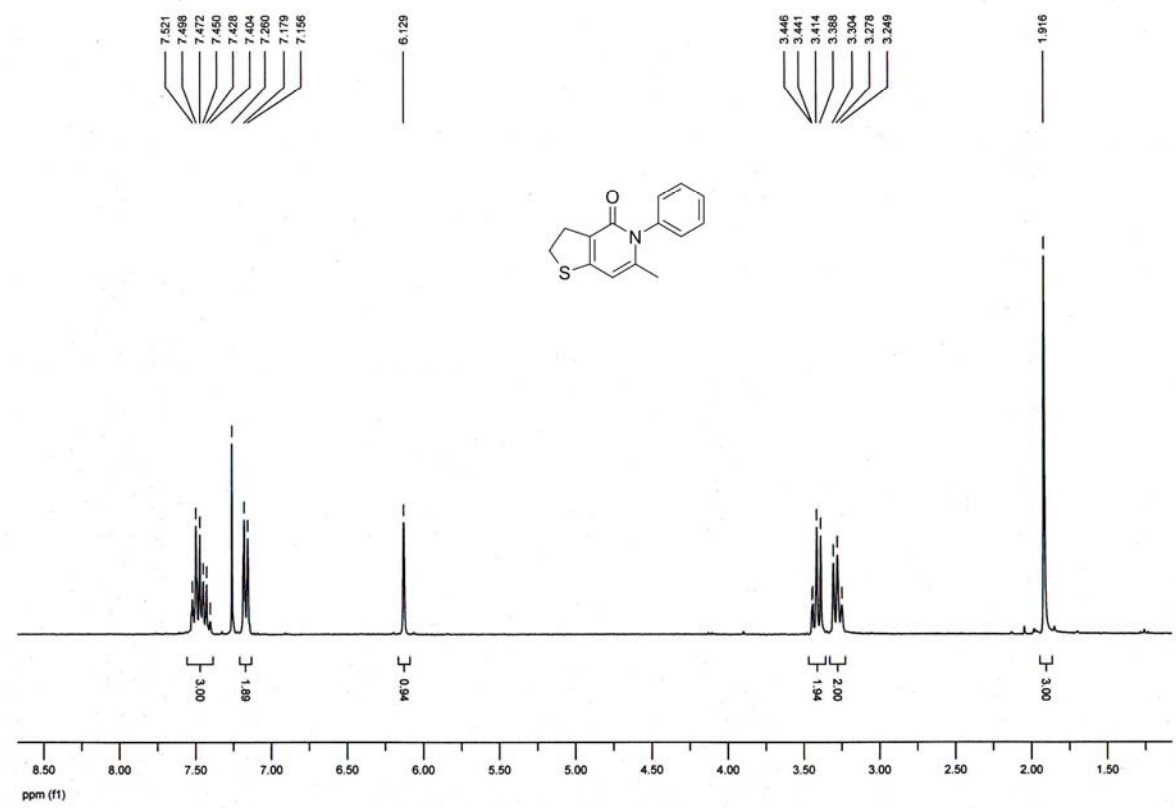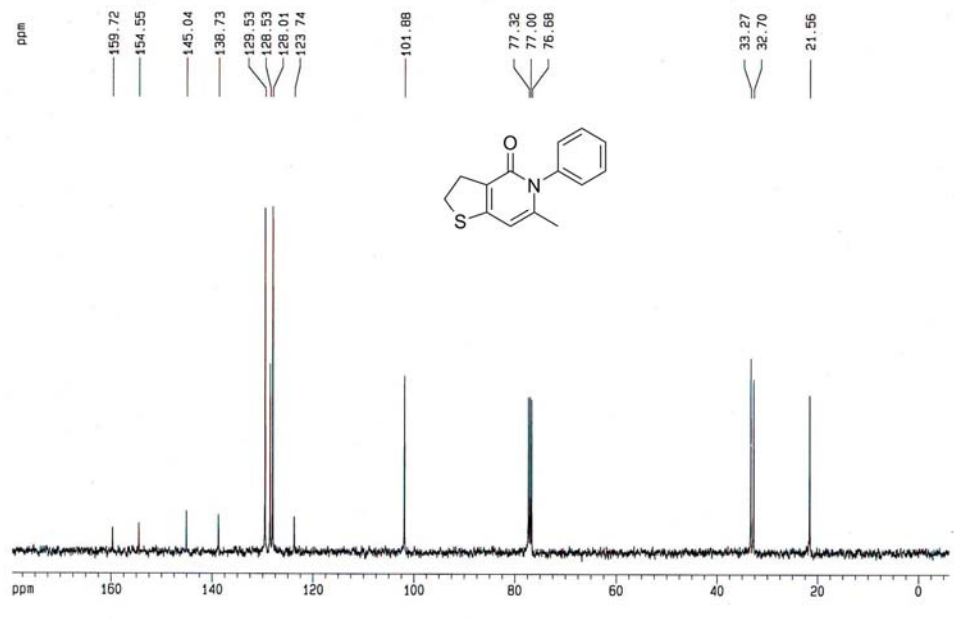

HP-03-28-2

Current Data Parameters  
NAME HPeng  
EXPNO 13  
PROCNO 1

F2 - Acquisition Parameters  
Date\_ 20110328  
Time 20.25  
INSTRUM av400  
PROBHD 5 mm PHDQ 13C  
PULPROG zgpgc  
TO 16384  
SOLVENT CDCl3  
NS 297  
DS 0  
SWH 25062.656 Hz  
FIDRES 1.529703 Hz  
AQ 0.3269108 sec  
RG 8192  
DW 19.950 usec  
DE 8.00 usec  
TE 300.0 K  
D1 0.69999999 sec  
d11 0.03000000 sec

----- CHANNEL f1 -----  
NUC1 13C  
P1 4.20 usec  
PL1 2.00 dB  
SFO1 100.5785294 MHz

----- CHANNEL f2 -----  
CPDPRG2 waltz16  
NUC2 1H  
PCPD2 90.00 usec  
PL2 2.00 dB  
PL12 17.50 dB  
SFO2 399.9515998 MHz

F2 - Processing parameters  
SI 65536  
SF 100.5675183 MHz  
WDW EM  
SSB 0  
LB 4.00 Hz  
GB 0  
PC 1.00

1D NMR plot parameters  
CX 22.00 cm  
CY 8.00 cm  
FIP 179.541 ppm  
F1 18025.96 Hz  
F2P -6.077 ppm  
F2 -611.17 Hz  
PPMCM 8.43718 ppm/cm  
HZCM 848.50616 Hz/cm

21

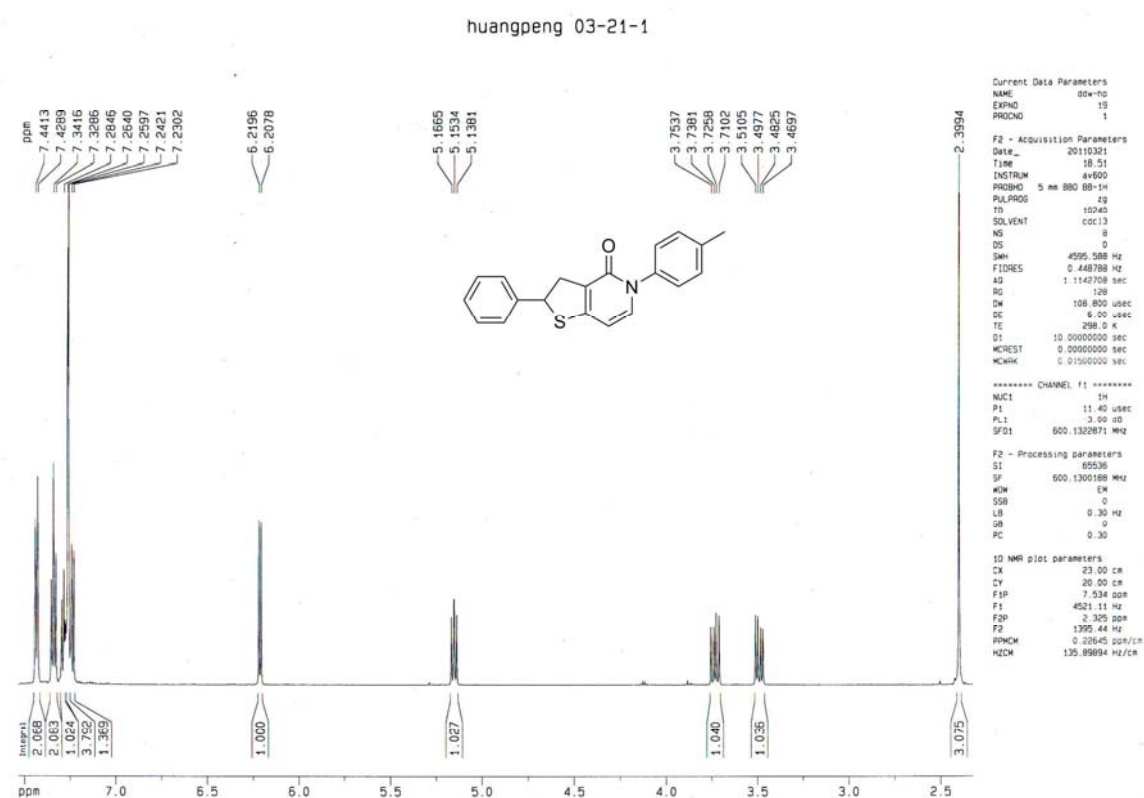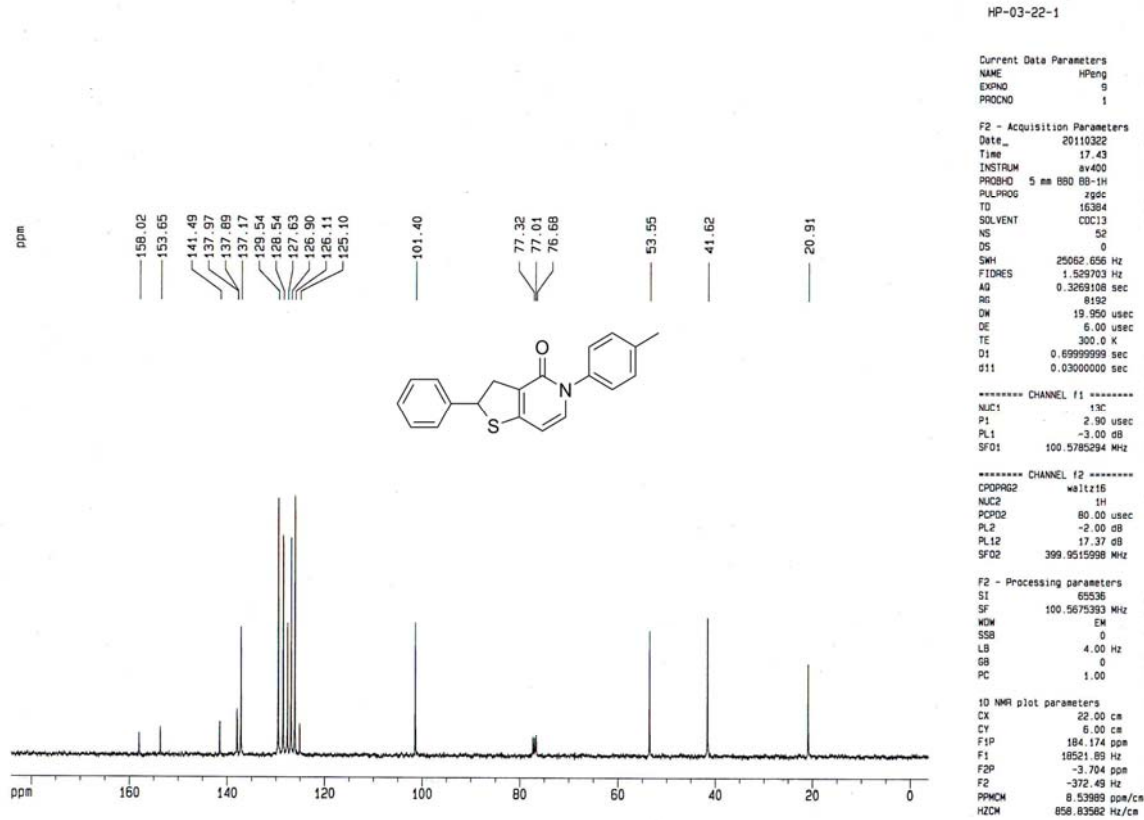

III. Copies of NMR spectra for products 3

3a

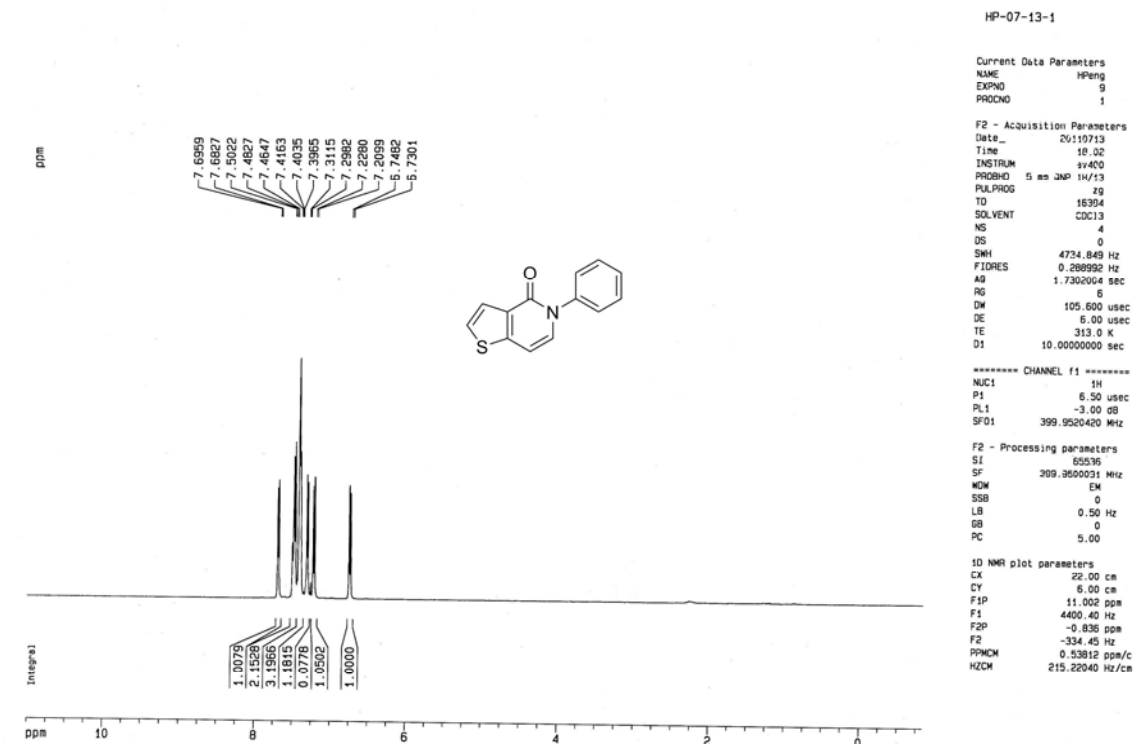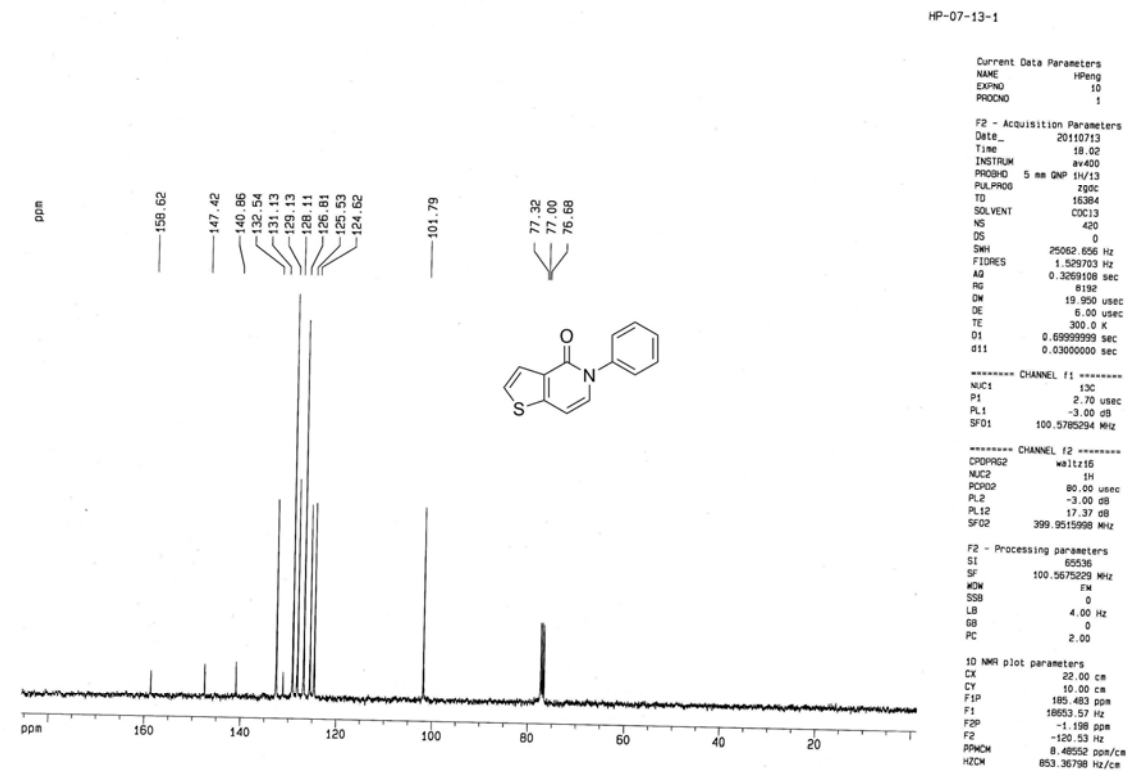

3e

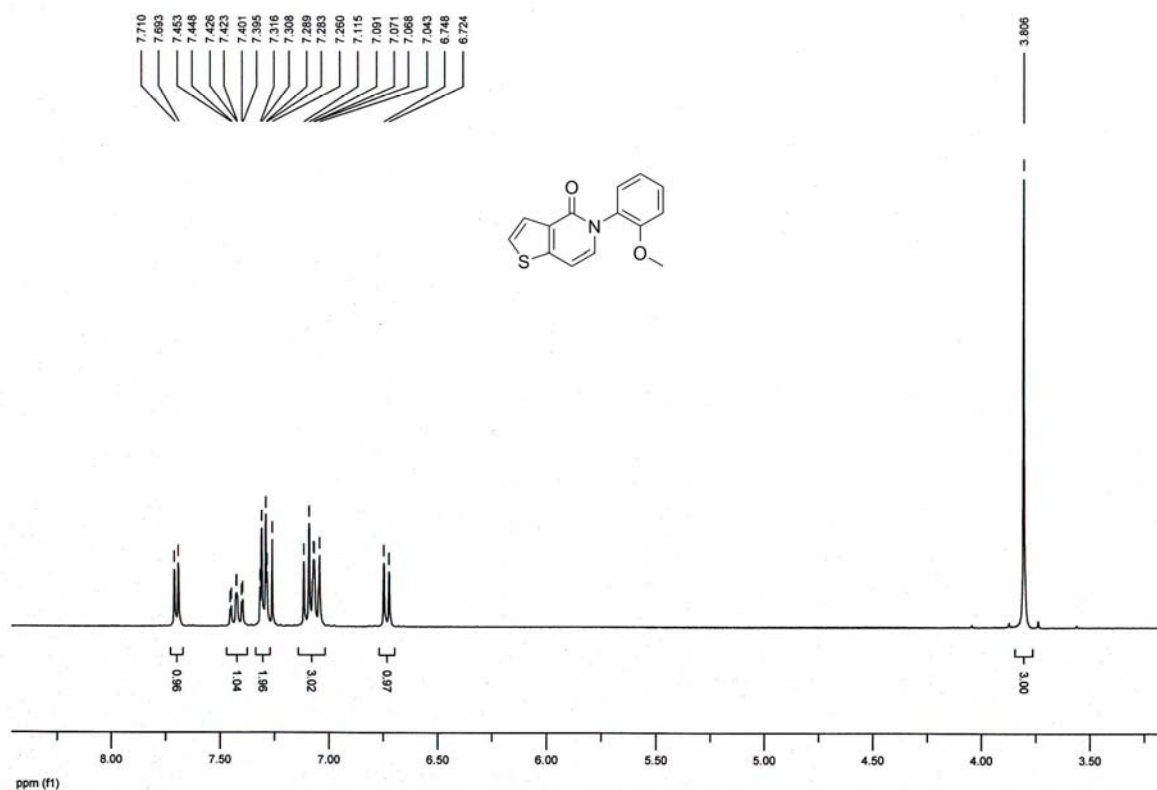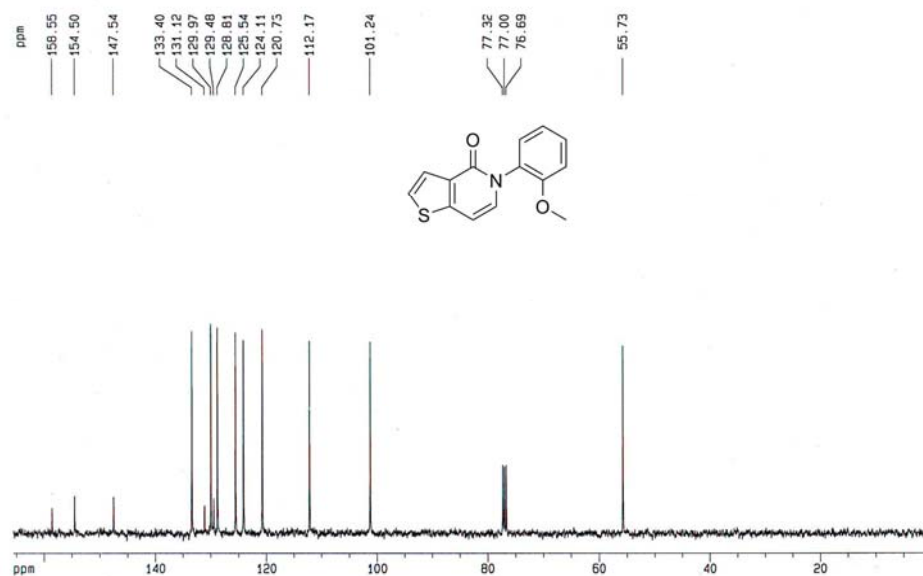

HP-03-28-3

Current Data Parameters  
NAME HPeng  
EXPNO 14  
PROCNO 1

F2 - Acquisition Parameters  
Date\_ 20110328  
Time 23.52  
INSTRUM av400  
PROBHD 5 mm QNP1H 13C  
PULPROG zgpg30  
TD 16384  
SOLVENT CDCl3  
NS 168  
DS 0  
SWH 25062.656 Hz  
FIDRES 1.529703 Hz  
AQ 0.3269108 sec  
RG 8198  
DW 19.950 usec  
DE 6.00 usec  
TE 300.0 K  
D1 0.69999999 sec  
d11 0.03000000 sec

\*\*\*\*\* CHANNEL f1 \*\*\*\*\*  
NUC1 13C  
P1 4.20 usec  
PL1 2.00 dB  
SFO1 100.5785294 MHz

\*\*\*\*\* CHANNEL f2 \*\*\*\*\*  
CPDPRG2 waltz16  
NUC2 1H  
PCPD 40.00 usec  
PL2 2.00 dB  
PL12 17.50 dB  
SFO2 399.9615998 MHz

F2 - Processing parameters  
SI 65536  
SF 100.5675252 MHz  
WDW EM  
SSB 0  
LB 4.00 Hz  
GB 0  
PC 1.00

10 NMR plot parameters  
CX 22.00 cm  
CY 5.00 cm  
F1P 165.591 ppm  
F1 16653.10 Hz  
F2P 0.311 ppm  
F2 31.23 Hz  
PPHCH 7.51276 ppm/cm  
HZCM 755.53943 Hz/cm

3h

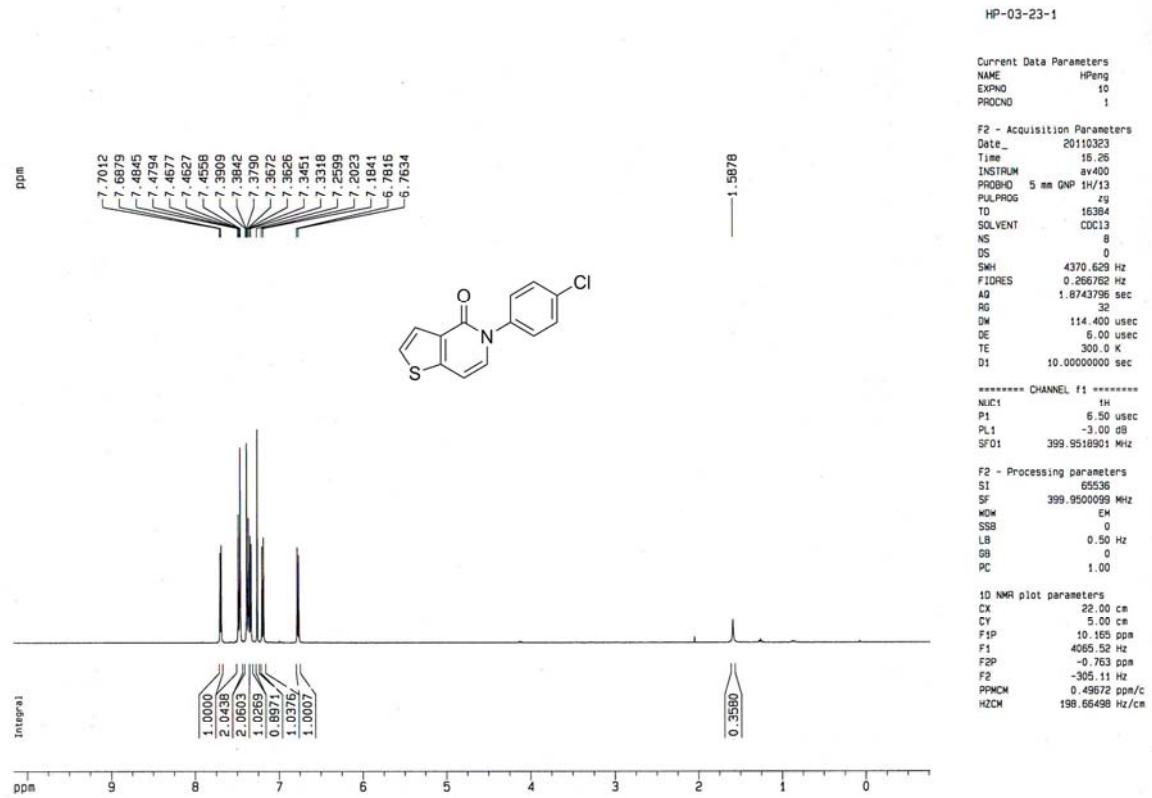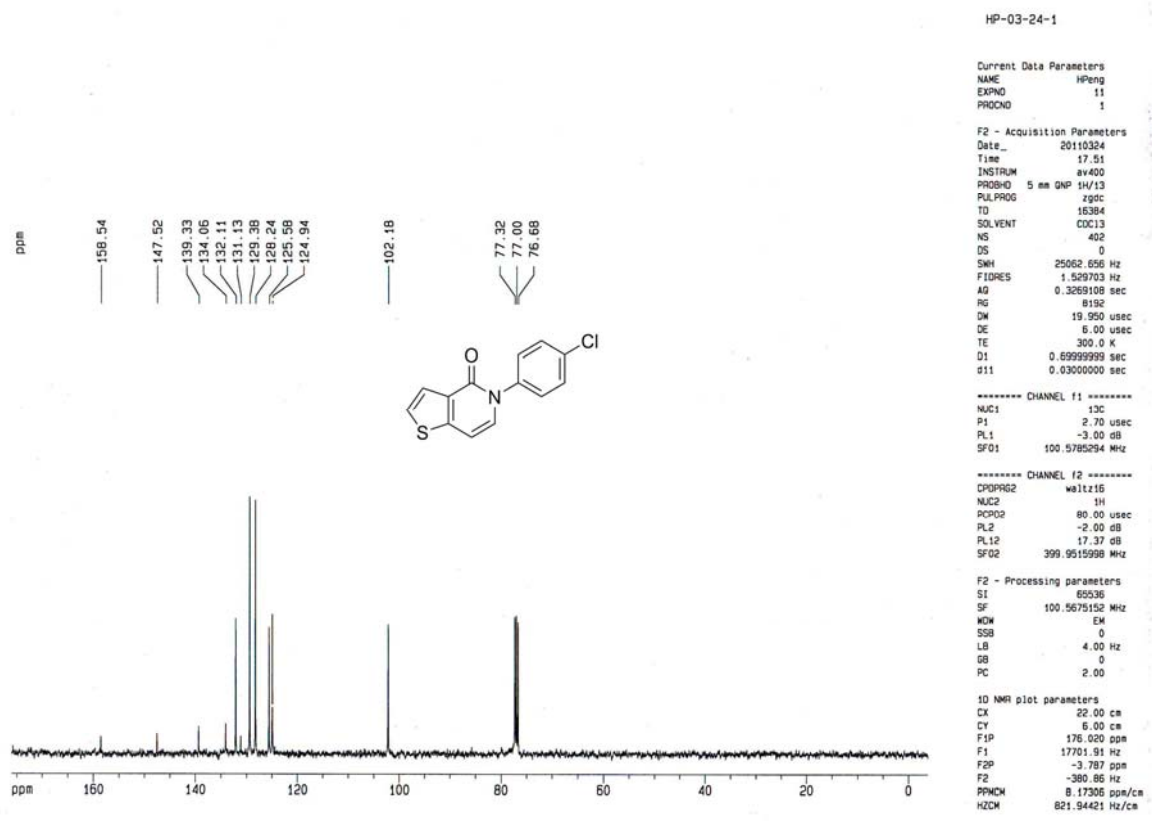

3k

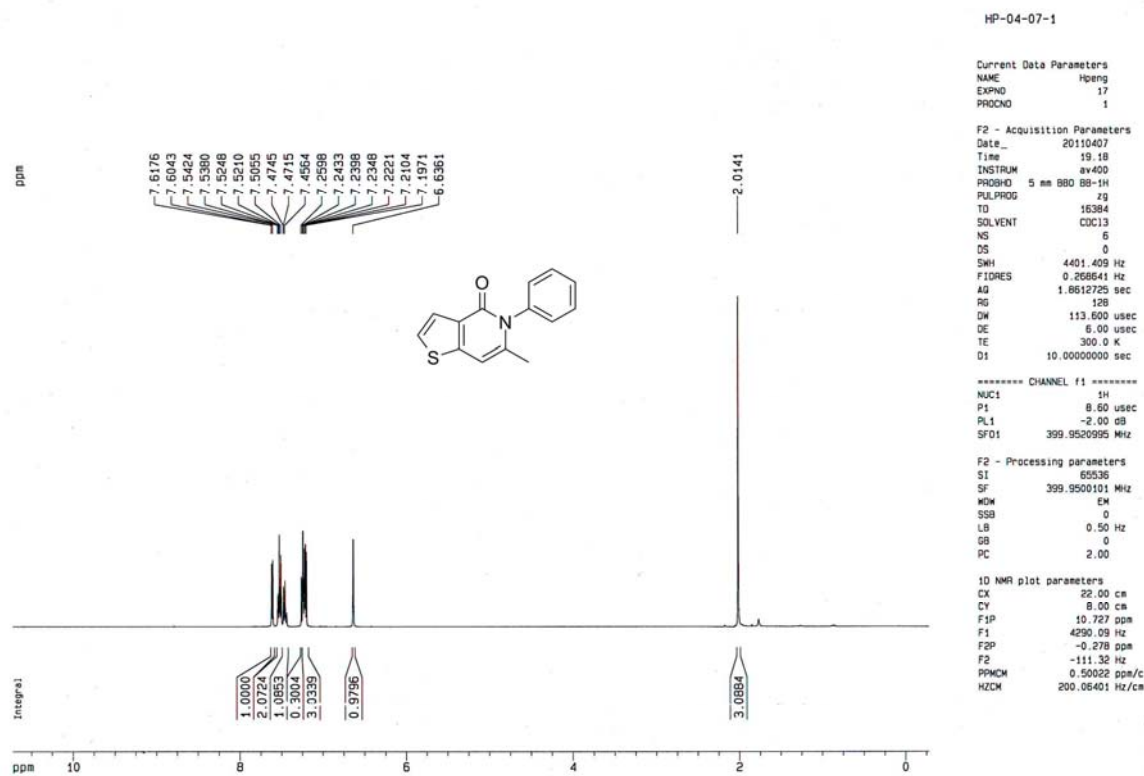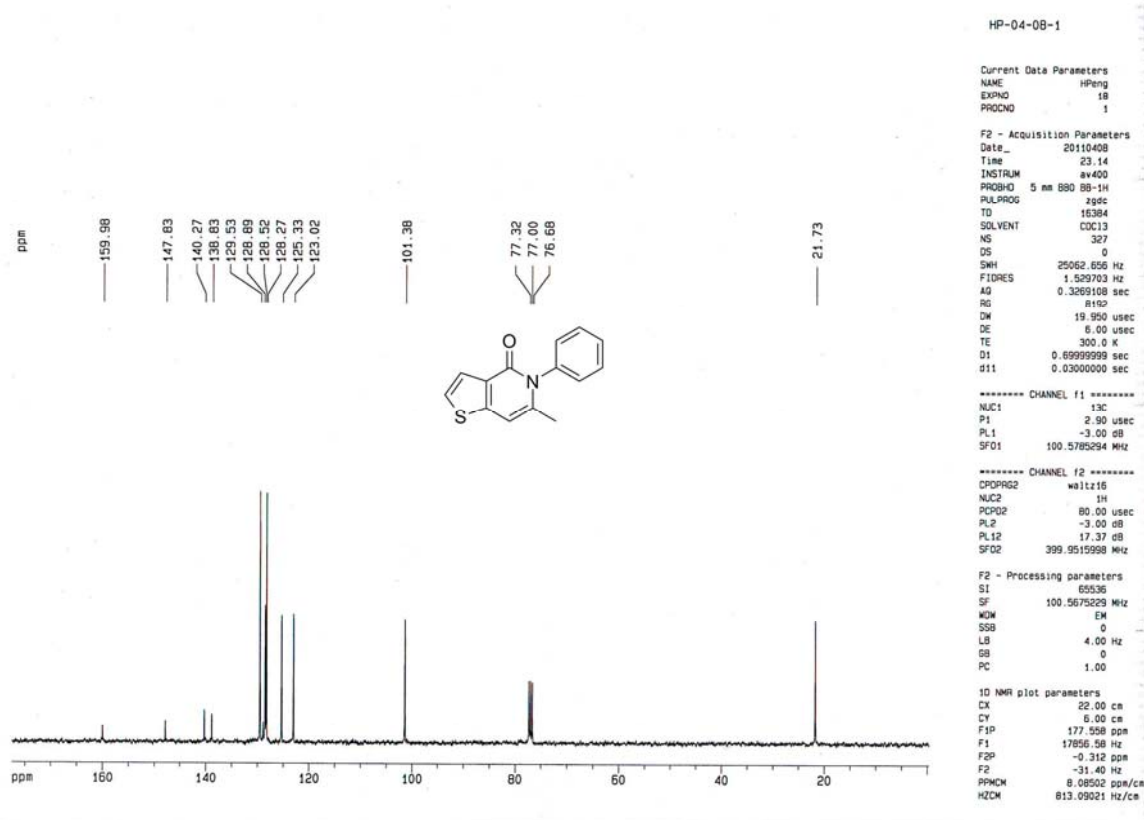



31

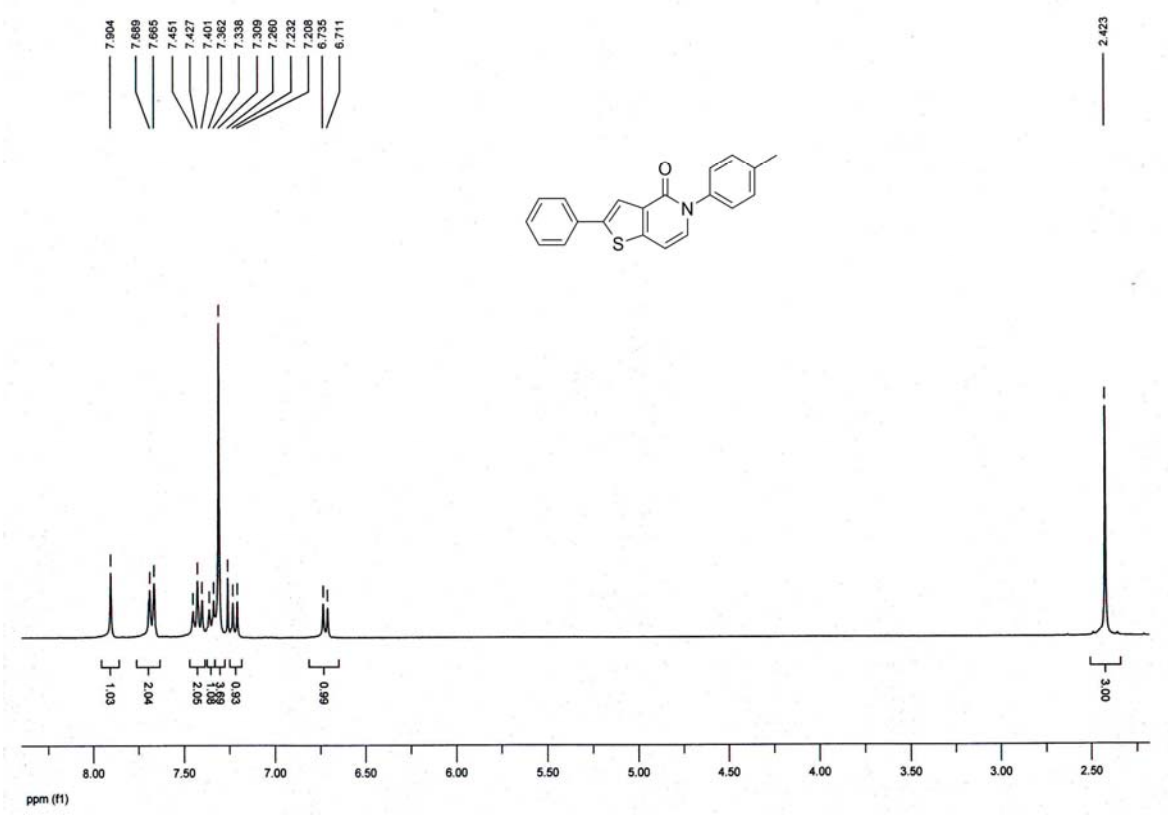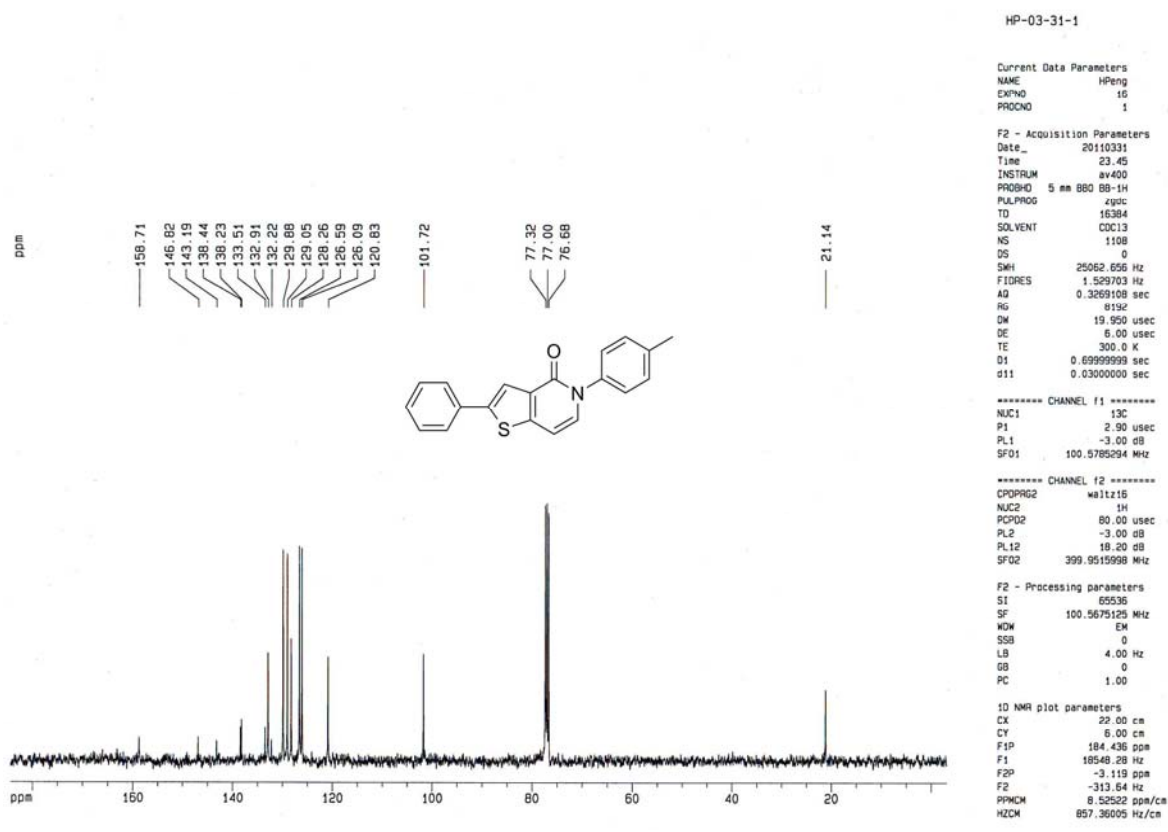

HP-03-31-1

Current Data Parameters  
NAME HPeng  
EXPNO 16  
PROCNO 1

F2 - Acquisition Parameters  
Date\_ 20110331  
Time 23.45  
INSTRUM av400  
PROBHD 5 mm BBO BB-1H  
PULPROG zgpg  
TD 16384  
SOLVENT CDCl3  
NS 1108  
DS 0  
SWH 25062.656 Hz  
FIDRES 1.529703 Hz  
AQ 0.3269108 sec  
RG 6192  
DM 19.950 usec  
DE 6.00 usec  
TE 300.0 K  
D1 0.69999999 sec  
d11 0.03000000 sec

\*\*\*\*\* CHANNEL f1 \*\*\*\*\*  
NUC1 13C  
P1 2.90 usec  
PL1 -3.00 dB  
SFO1 100.5785894 MHz

\*\*\*\*\* CHANNEL f2 \*\*\*\*\*  
CPDPRG2 waltz16  
NUC2 1H  
PCPD2 80.00 usec  
PL2 -3.00 dB  
PL12 18.20 dB  
SFO2 399.9515998 MHz

F2 - Processing parameters  
SI 65536  
SF 100.5679125 MHz  
WDW EM  
SSB 0  
LB 4.00 Hz  
GB 0  
PC 1.00

1D NMR plot parameters  
CX 22.00 cm  
CY 6.00 cm  
F1P 184.436 ppm  
F1 18548.28 Hz  
F2P -3.119 ppm  
F2 -313.64 Hz  
PPHOM 8.52522 ppm/cm  
HZCM 857.36005 Hz/cm
